# Dynamic control of hippocampal spatial coding resolution by local visual cues

Romain Bourboulou<sup>1\*</sup>, Geoffrey Marti<sup>1\*</sup>, François-Xavier Michon<sup>1</sup>, Morgane Nougier<sup>1</sup>,  
David Robbe<sup>1</sup>, Julie Koenig<sup>1&</sup> and Jérôme Epsztein<sup>1&</sup>

<sup>1</sup>Institute of Neurobiology of the Mediterranean Sea (INMED), French National Institute for Health and Research (INSERM UMRS1249), Aix-Marseille University, Marseille, France.

\* Equally contributing first authors

& Co-senior authors

Correspondence

Drs Jérôme Epsztein or Julie Koenig

INMED/INSERM U1249

Parc scientifique de Luminy

163 route de Luminy

BP 13 13273

Marseille cedex 09

Tel: 00 33 4 91 82 81 47

[jerome.epsztein@inserm.fr](mailto:jerome.epsztein@inserm.fr)

[julie.koenig@inserm.fr](mailto:julie.koenig@inserm.fr)

## 1 **Abstract**

2 The ability to flexibly navigate an environment relies on a hippocampal-dependent internal  
3 cognitive map. Explored space can be internally mapped at different spatial resolutions.  
4 However, whether hippocampal spatial coding resolution can be dynamically controlled  
5 within and between environments is unknown. In this work we recorded the firing of  
6 hippocampal principal cells in mice navigating virtual reality environments, which differed by  
7 the presence of local visual cues (virtual 3D objects). Objects improved spatial coding  
8 resolution globally with a higher proportion of place cells, smaller place fields, increased  
9 spatial selectivity and stability. Spatial coding resolution was notably enhanced locally near  
10 objects and could be rapidly tuned by their manipulations. In the presence of objects, place  
11 cells also displayed improved theta phase precession and theta timescale spike coordination.  
12 These results suggest that local visual cues can rapidly tune the resolution of the  
13 hippocampal mapping system within and between environments.

## 14 **Introduction**

15 Animals can flexibly navigate their environment. In mammals such as rodents and humans,  
16 this ability is thought to rely on an internal cognitive map (Tolman, 1948; O’Keefe and Nadel,  
17 1978; Epstein et al., 2017). When animals move in their environment, hippocampal place  
18 cells fire in specific locations (their place fields) and this spatial tuning is believed to provide  
19 a neuronal substrate to the cognitive map. To be useful for navigation, such internal  
20 representation should be properly oriented and positioned in reference to the external  
21 world. Distal visual cues or intramaze objects located at the border of an environment play a  
22 predominant role in map orientation while environmental boundaries are important for map  
23 anchoring (O’Keefe and Burgess, 1996; Knierim and Rao, 2003; Knierim and Hamilton, 2011).  
24 A dynamic control of hippocampal spatial coding resolution between environments or  
25 different regions of the same environment could be important for spatial navigation (Geva-  
26 Sagiv et al., 2015). Spatial coding resolution can be improved by increasing the proportion of  
27 spatially selective cells (place cells) coding for these locations (e.g. overrepresentation), by  
28 reducing place field size but also by enhancing their spatial selectivity, stability and spatial  
29 information content. Wild animals, including rodents, often travel kilometers away from  
30 their home through empty space to specific food locations (Taylor, 1978). Mapping all  
31 traveled space at similar spatial resolution would require a huge neuronal and  
32 computational investment. Alternatively, mapping different parts of an environment at  
33 different spatial resolutions could be advantageous. Previous studies have reported  
34 increased place field density near rewarded locations (O’Keefe and Conway, 1978; Hollup et  
35 al., 2001; Dupret et al., 2010; Danielson et al., 2016; Sato et al., 2018), salient sensory cues  
36 (Wiener et al., 1989; Hetherington and Shapiro, 1997; Sato et al., 2018) or connecting parts  
37 in multi-compartment environments (Spiers et al., 2015). Whether these  
38 overrepresentations correspond to position coding at higher spatial resolution (i.e. the  
39 resolution of the “where” information) or the coding of nonspatial information associated  
40 with these particular locations (also referred to as “what” information) is difficult to  
41 disentangle. If they would represent increased spatial resolution, then place fields should  
42 not only be more numerous but they should also more accurately code for space in terms of  
43 spatial selectivity, spatial information content and stability. Furthermore, in the context of  
44 navigation, spatial coding resolution should be rapidly adjustable within and between

45 environments. Finally, improved spatial coding resolution should extend to the temporal  
46 coding domain.

47         The factors controlling spatial coding resolution are poorly understood. Local sensory  
48 cues, with a higher sensory resolution compared to distal cues, could be instrumental in this  
49 process according to sensory-based models of place cell activation (O'Keefe and Burgess,  
50 1996; Hartley et al., 2000; Barry et al., 2006; Geva-Sagiv et al., 2015; Strösslin et al., 2005;  
51 Sheynikhovich et al., 2009). Here we took advantage of virtual reality (Holscher, 2005;  
52 Youngstrom and Strowbridge, 2012; Chen et al., 2013; Ravassard et al., 2013; Aronov and  
53 Tank, 2014; Cohen et al., 2017) to specifically control and manipulate local sensory cues and  
54 test their impact on hippocampal spatial coding resolution. We recorded a large number of  
55 hippocampal cells in area CA1 to be able to use decoding strategies to decipher the  
56 functional impact of the changes observed. Our results show that local visual cues (virtual 3D  
57 objects) increased spatial coding resolution globally with a higher proportion of place cells,  
58 improved spatial selectivity, information content and stability. Spatial coding resolution was  
59 notably enhanced near objects with a higher local density of place fields but also decreased  
60 place field size and stability. Spatial resolution could be instantaneously tuned upon removal  
61 or addition of local cues. Importantly, increased spatial coding resolution extended to the  
62 temporal coding domain. Altogether our results suggest that the hippocampal system can  
63 rapidly and dynamically adjust its spatial coding resolution within and between  
64 environments.

## 65 Results

### 66 Effects of local visual cues on spatial coding resolution

67 Head-fixed mice were trained to run on a wheel and to shuttle back and forth on a 2 m-long  
68 virtual linear track to collect liquid rewards at its extremities (Fig. 1A). The lateral walls of the  
69 virtual track displayed distinct visual patterns to provide directional information. However,  
70 these patterns did not provide any information relative to the position of the animal on  
71 track. To investigate the contribution of local cues to hippocampal spatial representation,  
72 mice were trained either in the presence or absence of 3D visual cues (hereafter called  
73 virtual objects; Object Track, OT:  $n = 2$  mice; No Object Track,  $\emptyset$ T:  $n = 3$  mice), which were  
74 virtually positioned on the floor of the track between the animal trajectory and the walls  
75 (Fig. 1B). The running wheel forced the animals to run in a unidirectional manner so that  
76 they repetitively ran along the virtual objects without the possibility to orient toward them  
77 or explore them with any sensory modality but vision. Animals received a reward (sucrose in  
78 water 5%) each time they reached one of the extremities of the linear track. After licking, the  
79 mice were “teleported” in the same position but facing the opposite direction of the track  
80 (Fig. 1C), allowing them to run back and forth in the same environment. Once animals  
81 reached a stable and proficient behavior (at least 1 reward/minute during a 60 min-long  
82 session), we recorded spiking activity in the pyramidal cell layer of the CA1 hippocampal  
83 region using either 4-shanks or 8-shanks silicon probes (Fig. 1A, Figure 1-figure supplement  
84 1) in the right and/or left hemispheres over the course of 2-3 days. A total of 1124 neurons  
85 were recorded in the CA1 pyramidal cell layer. Mice trained in  $\emptyset$ T ( $n = 9$  recording sessions)  
86 performed the task with similar proficiency than mice trained in OT ( $n = 5$  recording  
87 sessions), as shown by similar rate of reward collections ( $\emptyset$ T:  $1.70 \pm 0.29$  rewards/minute,  $n$   
88 = 9 recording sessions in 3 mice; OT:  $1.15 \pm 0.09$  rewards/minute,  $n = 5$  recording sessions in  
89 2 mice;  $t_{12} = 1.40$ ,  $P = 0.19$ , two-tailed unpaired  $t$ -test; all values expressed as mean  $\pm$  SEM)  
90 and average running speed ( $\emptyset$ T:  $14.1 \pm 2.12$  cm/s,  $n = 9$  recording sessions in 3 mice; OT:  
91  $16.8 \pm 1.58$  cm/s,  $n = 5$  recording sessions in 2 mice;  $Z = -1.27$ ,  $P = 0.24$ , two-tailed Wilcoxon  
92 rank sum (WRS) test; Fig. 1C).

93 To examine how local visual cues impacted spatial representation of the linear track  
94 we first compared the number of track-active putative pyramidal cells to assess for overall  
95 excitability and the proportion of place cells among them to assess for spatial resolution. The

96 percentage of track active cells was comparable in between the track without and with  
97 virtual objects ( $\emptyset$ T:  $66.4 \pm 5.8\%$ ,  $n = 7$  sessions in 3 mice; OT:  $52.8 \pm 7.8\%$ ,  $n = 5$  sessions in 2  
98 mice;  $t_{10} = 1.43$ ,  $P = 0.18$ , two-tailed unpaired  $t$ -test; Fig. 1D). However, while only 19% of  
99 track active cells had at least one place field (place cells) in the empty track ( $n = 48$  place  
100 cells), 73% of track active cells were place cells when virtual objects were present ( $n = 103$   
101 place cells;  $t_{10} = -7.2$ ,  $P < 10^{-4}$ , two-tailed unpaired  $t$ -test; Fig. 1E). In  $\emptyset$ T, place fields were  
102 relatively sparse in the middle of the track with a large proportion of them aligned either to  
103 the beginning or to the end of the track (End-Track fields:  $49.3 \pm 8.99\%$ ,  $n = 7$  sessions in 3  
104 mice; Fig. 2A). In the maze with objects, however, the majority of fields was located in the  
105 central part of the track (On-Track fields:  $84.3 \pm 1.50\%$ ;  $n = 5$  sessions in 2 mice;  $Z = 2.03$ ,  $P =$   
106  $0.048$ , two-tailed WRS test; Fig. 2A). These results indicate that local visual cues can strongly  
107 increase the proportion of place cells among active cells notably to code the central part of  
108 the maze.

109 Another factor influencing spatial resolution is place field size. There was a tendency  
110 for place field width (calculated on complete fields) to be lower in the track with objects ( $\emptyset$ T:  
111  $51.5 \pm 3.33$  cm,  $n = 15$  place fields; OT:  $44.6 \pm 1.60$  cm,  $n = 95$  place fields;  $Z = 1.92$ ,  $P = 0.055$ ,  
112 two-tailed WRS test; Fig. 1G), in agreement with a higher spatial coding resolution.  
113 Decreased place field width could be due to spatial shrinking of place fields detected on a  
114 trial-by-trial basis, could result from decreased inter-trial variability in their position, or both.  
115 To decipher among these possibilities, we detected place fields on single trials then  
116 calculated their size and averaged them to get a single value for each place field (Cabral et  
117 al., 2014). The size of place fields based on single trial detection was not significantly  
118 different between the two conditions ( $\emptyset$ T:  $34.4 \pm 1.2$  cm,  $n = 15$  place fields; OT:  $33.5 \pm 0.6$   
119 cm,  $n = 94$  place fields;  $Z = 1.1$ ,  $P = 0.28$ , two-tailed WRS test). On the other hand, the spatial  
120 dispersion of single-trial detected place fields was significantly reduced in the presence of 3D  
121 objects ( $\emptyset$ T:  $11.9 \pm 0.90$  cm,  $n = 48$  place cells; OT:  $7.58 \pm 0.55$  cm,  $n = 103$  place cells;  $Z =$   
122  $4.25$ ,  $P < 10^{-4}$ , two-tailed WRS test; Fig. 1H). These results suggest that the decreased place  
123 field size resulted from decreased inter-trial spatial dispersion. To further assess inter-trial  
124 place field stability, independently from place field detection, we calculated a stability index  
125 (based on spatial correlations between all pairs of firing rate vectors, see Materials and  
126 methods section). This stability index was significantly lower in the track without objects  
127 ( $\emptyset$ T:  $0.12 \pm 0.01$ ,  $n = 48$  place cells; OT:  $0.34 \pm 0.02$ ,  $n = 103$  place cells;  $Z = -7.26$ ,  $P < 10^{-12}$ ,

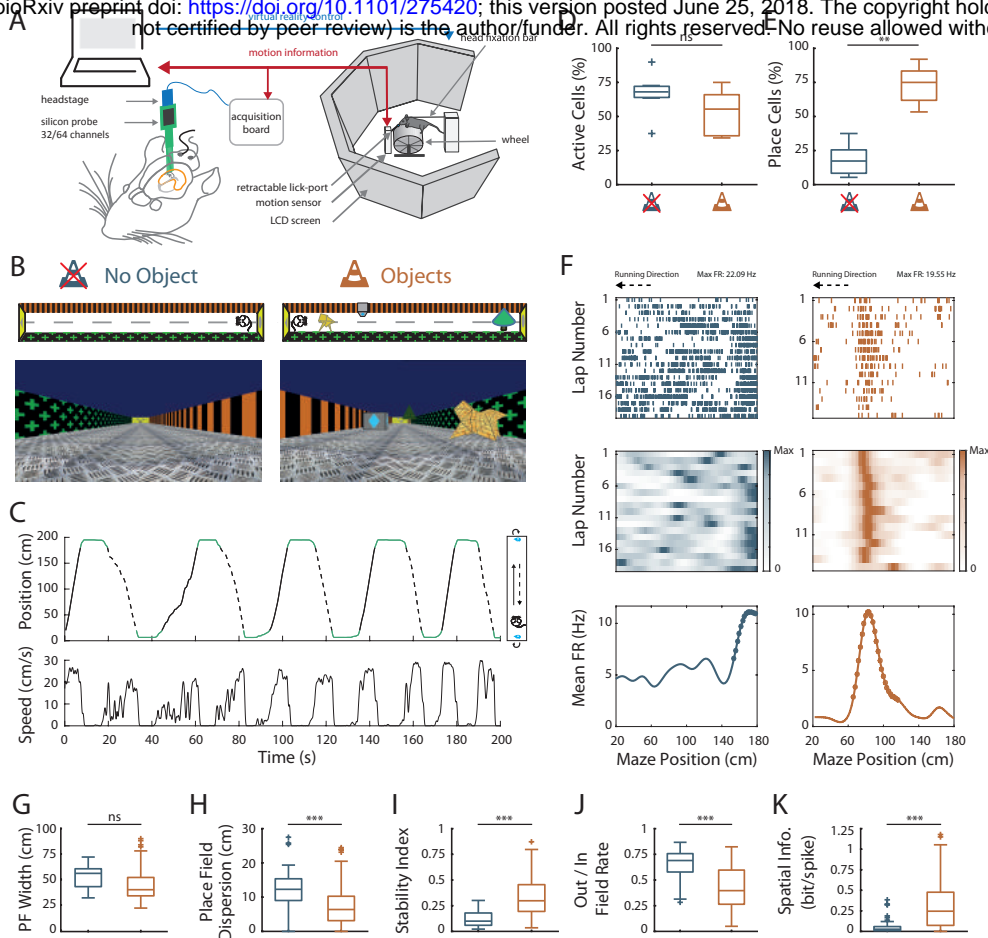

## Figure 1: Effects of virtual 3D objects on spatial coding resolution

**A.** Schema of the virtual reality set up. The mouse is head-fixed and located on a wheel surrounded by LCD screens where a virtual environment is displayed. **B.** Top and first person views of virtual linear tracks used. Left: track without objects (ØT) and right: track with virtual 3D objects (OT). **C.** Top: Animal's position in the virtual track as a function of time. Green lines indicate times when animal was in a reward zone location. These locations were not considered for further analysis. Solid and dotted black lines indicate back and forth trials respectively. Top view of animal in the maze is depicted on the right. Arrows indicate teleportation in the same position but facing opposite direction after reward consumption. Bottom: Animal's speed as a function of time. **D. E.** Box plots of the percentage of active cells (**D**;  $P = 0.18$ , two-tailed unpaired  $t$ -test) and place cells (**E**;  $P < 10^{-4}$ , two-tailed unpaired  $t$ -test) in the maze without (blue) and with (orange) objects (same color code throughout the figures). **F.** Spike raster plots (top) and color-coded firing rate map (middle) for successive trials in one direction (arrow) as a function of the position in the maze. Bottom: corresponding mean firing rate by positions. Dots indicate positions of the detected place field (see Material and Methods). **G-K.** Box plots of the place field width (**G**;  $P = 0.055$ , two-tailed Wilcoxon rank sum (WRS) test), the place field dispersion (**H**;  $P < 10^{-4}$ , two-tailed WRS test), the stability index (**I**;  $P < 10^{-12}$ , two-tailed WRS test), the out/in field firing rate (**J**;  $P < 10^{-4}$ , two-tailed WRS test) and the spatial information (**K**;  $P < 10^{-9}$ , two-tailed WRS test). For box plots in this and subsequent figures, box extends from the first (Q1) to the third quartile (Q3) with the band inside showing the median and the extremities of the whiskers include values greater than  $Q1 - 1.5 \cdot (Q3 - Q1)$  and smaller than  $Q3 + 1.5 \cdot (Q3 - Q1)$ .

128 two-tailed WRS test; Fig. 1I). Altogether, these results demonstrate that local visual cues can  
129 improve inter-trial spatial stability.

130 An increase in spatial coding resolution would also be associated with higher spatial  
131 selectivity and information content. Spatial selectivity was assessed by comparing the in-  
132 field versus out-of-field firing rates (i.e., signal to noise ratio) for place fields recorded in OT  
133 and  $\emptyset$ T. In the track without objects, place cells increased their firing rate inside the place  
134 field ( $7.44 \pm 0.75$  Hz,  $n = 48$  place cells) but also discharged at high rate outside the field  
135 ( $5.23 \pm 0.62$  Hz; Fig. 1F and J; ratio:  $0.65 \pm 0.02$ ). In comparison, place cells recorded in the  
136 track with objects had comparable firing rates inside the place field ( $6.73 \pm 0.61$  Hz,  $n = 103$   
137 place cells;  $Z = 1.67$ ,  $P = 0.1$ , two-tailed WRS test) but fired significantly less outside the field  
138 ( $3.53 \pm 0.49$  Hz; ratio:  $0.42 \pm 0.02$ ; Fig. 1F and J;  $Z = 3.99$ ,  $P < 10^{-4}$ , two-tailed WRS test).  
139 Accordingly, spatial information (in bit/spike), a measure independent of place fields'  
140 detection (William E. Skaggs and Bruce L. McNaughton and Katalin M. Gothard and Etan J.  
141 Markus, 1993) was very low in the track without object ( $0.06 \pm 0.01$  bit/spike,  $n = 48$  place  
142 cells) and significantly higher in the presence of objects ( $0.32 \pm 0.03$  bit/spike,  $n = 103$  place  
143 cells;  $Z = -6.29$ ,  $P < 10^{-9}$ , two-tailed WRS test; Fig. 1K). Similar results were obtained with a  
144 different method to estimate spatial information content based on the original mutual  
145 information metric with a normalization to correct possible bias due to differences in basal  
146 firing rates between conditions (Souza et al., 2018) ( $\emptyset$ T: 1.66,  $n = 48$  place cells; OT: 6.62,  $n =$   
147 103 place cells;  $Z = -7.36$ ,  $P < 10^{-12}$ , two-tailed WRS test).

148 Altogether these results indicate that local visual cues can strongly enhance the  
149 proportion of place cells among active cells but also place cell's coding accuracy in  
150 agreement with an improved spatial coding resolution.

151

### 152 **Virtual 3D objects improve spatial resolution locally**

153 We then wondered whether 3D objects could enhance spatial resolution locally within the  
154 same environment. To address this question, we focused our analysis on On-Track fields  
155 recorded in the OT. We first noticed that the distribution of these fields was non-uniform on  
156 the track ( $P = 0.001$ , test of non-uniformity). To quantify more precisely this effect, we  
157 divided the linear track in Objects Zones (OZ) and No Objects Zones ( $\emptyset$ Z), depending if a  
158 given track zone contained an object or not, respectively (Fig. 2A, right). The density of place  
159 fields was significantly higher in OZ (OZ:  $8.80 \pm 1.09\%$  /10 cm,  $n = 12$  spatial bins of 10 cm, 6



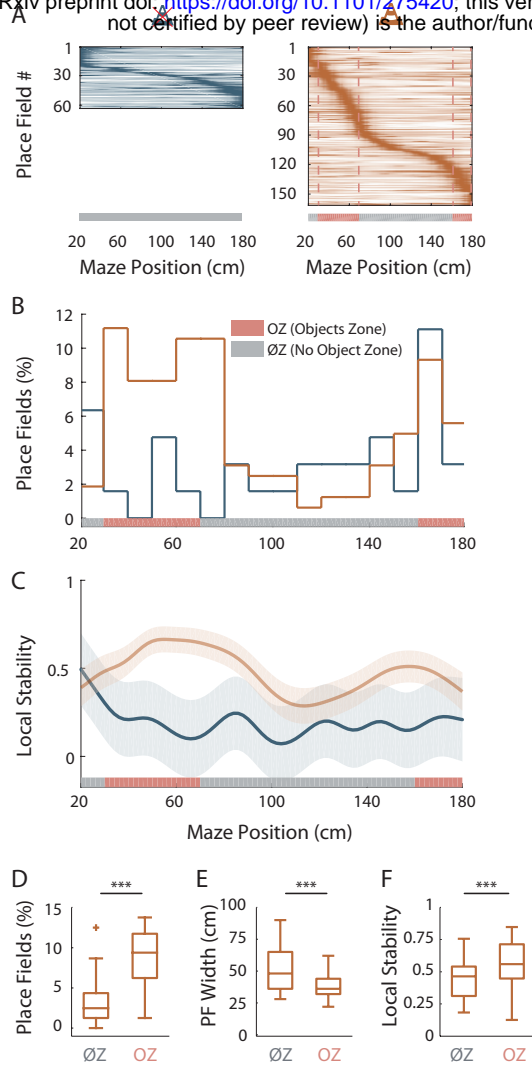

## Figure 2: Virtual 3D objects improve spatial resolution locally

**A.** Color-coded mean firing rate maps of all place fields recorded in the maze without objects (left) or with objects (right). The color codes for the intensity of the bin's mean firing rate normalized on the maximal mean firing rate (peak rate) in the recording session. The place cells are ordered according to the position of their peak rate in the track (reward zones excluded). Bottom: The tracks were divided into Objects Zones (OZ, in red on the x-axis) around the objects and No Object Zones (ØZ, in grey on the x-axis) deprived of objects. Red dotted lines depict the boundaries of the OZ in the track with objects. **B.** Percentage of On-Track place fields at each spatial bin (10 cm) in the maze with (orange line) and without objects (blue line). **C.** Mean local stability index (solid lines)  $\pm$  SEM (shaded bands) for place cells with On-Track fields at each spatial bin in the track with (orange) or without (blue) objects. **D-F.** Box plots depicting the mean percentage of place fields per spatial bin (**D**;  $P < 10^{-4}$ , two-tailed unpaired  $t$ -test), the place field width (**E**;  $P = 0.00016$ , two-tailed WRS test) and the local stability index (**F**;  $P < 10^{-5}$ , two-tailed WRS test) in OZ and ØZ in the maze with objects.

160 in each direction;  $\emptyset Z$ :  $3.17 \pm 0.70\%$  /10 cm,  $n = 20$  spatial bins of 10 cm, 10 in each direction;  
161  $t_{30} = -4.54$ ,  $P < 10^{-4}$ , two-tailed unpaired  $t$ -test; Fig. 2B and D). Furthermore, in the maze with  
162 objects, place fields were significantly smaller in OZ ( $38.4 \pm 1.46$  cm,  $n = 50$  fields) compared  
163 to  $\emptyset Z$  ( $51.6 \pm 2.62$  cm,  $n = 45$  fields;  $Z = 3.71$ ,  $P = 0.00016$ , two-tailed WRS test; Fig. 2E).  
164 Accordingly, place field dispersion was also significantly reduced in OZ ( $7.15 \pm 0.59$  cm,  $n =$   
165  $87$  fields) compared to  $\emptyset Z$  ( $10.0 \pm 0.99$  cm,  $n = 49$  fields;  $Z = 2.53$ ,  $P = 0.011$ , two-tailed WRS  
166 test). A local stability index (see Materials and methods section) was significantly increased  
167 in OZ ( $0.56 \pm 0.02$ ,  $n = 60$  bins of 2 cm, 30 in each direction) compared to  $\emptyset Z$  ( $0.44 \pm 0.01$ ,  $n =$   
168  $100$  bins of 2 cm, 50 in each direction;  $Z = -4.68$ ,  $P < 10^{-5}$ , two-tailed WRS test; Fig. 2C and F).  
169 Finally we found no significant difference in the out-of-field versus in-field firing ratio  
170 between fields located in OZ or  $\emptyset Z$  (OZ:  $0.45 \pm 0.03$ ,  $n = 87$  fields;  $\emptyset Z$ :  $0.41 \pm 0.03$ ,  $n = 49$   
171 fields;  $Z = -0.62$ ,  $P = 0.54$ , two-tailed WRS test) nor changes in spatial information (OZ:  $0.36 \pm$   
172  $0.04$  bit/spike,  $n = 87$  fields;  $\emptyset Z$ :  $0.28 \pm 0.04$  bit/spike,  $n = 49$  fields;  $Z = -0.68$ ,  $P = 0.50$ , two-  
173 tailed WRS test). These results indicate that 3D objects can locally improve spatial coding  
174 resolution through a local increase in place field number, a local reduction in place field size  
175 and an higher local stability while their effect on spatial information content is more global.

176 We next wondered whether similar local effects on spatial coding resolution could be  
177 observed in the  $\emptyset T$ . In this track place fields were also non-uniformly distributed ( $P = 0$ ; test  
178 of non-uniformity) with a higher density of fields at the ends of the track (i.e. End-Track  
179 fields; Fig. 2A). However, we found no significant difference between End-Track and On-  
180 Track fields in terms of out-of-field versus in-field firing ratio (End-Track:  $0.65 \pm 0.02$ ,  $n = 31$   
181 fields; On-Track:  $0.63 \pm 0.03$ ,  $n = 32$  fields;  $Z = -0.04$ ,  $P = 0.97$ , two-tailed WRS test) and  
182 stability (End-Track:  $0.17 \pm 0.01$ ,  $n = 31$  fields; On-Track:  $0.15 \pm 0.02$ ,  $n = 32$  fields;  $t_{61} = 0.77$ ,  
183  $P = 0.45$ , two-tailed unpaired  $t$ -test). Spatial information was low for both types of fields but  
184 paradoxically lower for End-Track fields (End-Track:  $0.04 \pm 0.01$  bit/spike,  $n = 31$  fields; On-  
185 Track:  $0.09 \pm 0.02$  bit/spike,  $n = 32$  fields;  $Z = -2.54$ ,  $P = 0.01$ , two-tailed WRS test). We  
186 conclude that overrepresentation of the ends of the  $\emptyset T$  is not associated with increased  
187 spatial coding accuracy and is unlikely to represent increased spatial coding resolution at  
188 these locations.

189

190 **Local visual cues improve hippocampal population coding accuracy**

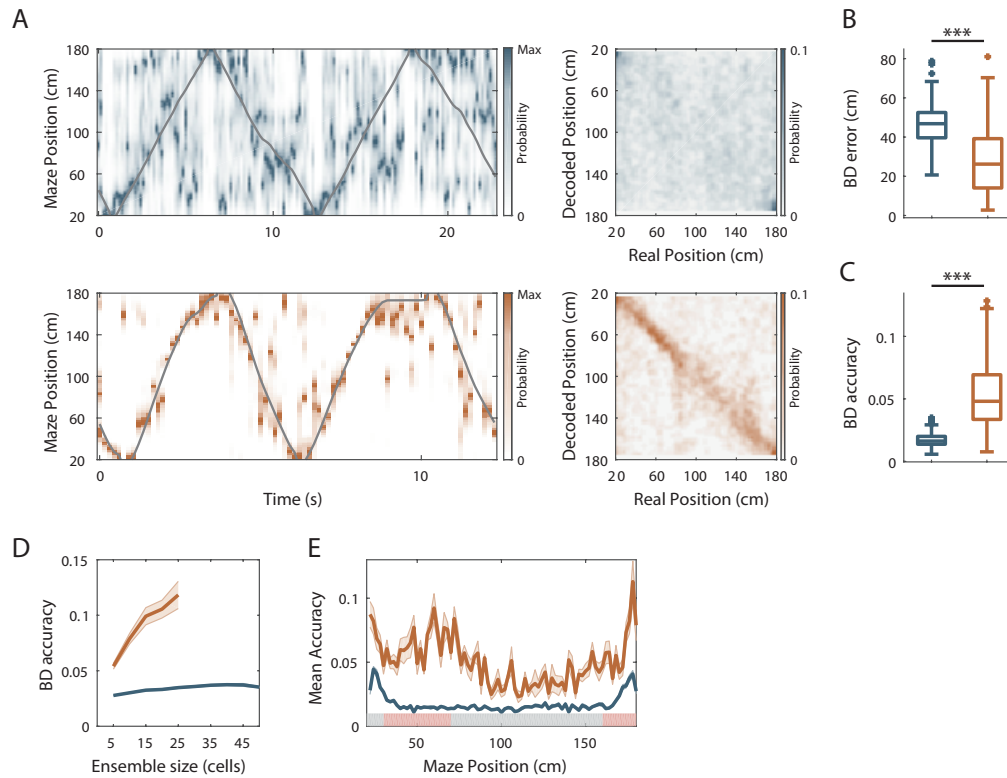

### Figure 3: Virtual 3D objects improve hippocampal population coding accuracy

**A.** Left: Color-coded distribution of the animal position's probability in the virtual track (the reward zones are excluded) computed using a Bayesian decoder (see Material and Methods) at each time window (500 ms) illustrated during 4 trials in the maze without (top) and with (bottom) objects. Spike trains of active cells were used to compute the animal position's probability. For visualization purpose, position probability is normalized by its maximum at each time bin. The real position is indicated with a solid grey line. Right: Confusion matrix between the real (x-axis) and the decoded position (y-axis) for all recording sessions performed on the track without objects (top) or with objects (bottom). **B.** Box plots depicting the Bayesian decoding error (BD error) in the maze with and without objects. The BD error was significantly higher in the maze deprived of objects ( $P < 10^{-23}$ , two-tailed WRS test). **C.** Box plots depicting the Bayesian decoding accuracy (BD accuracy) in the maze with and without objects. The BD accuracy was significantly higher in the maze with objects ( $P < 10^{-41}$ , two-tailed WRS test). **D.** Mean BD accuracy (solid lines)  $\pm$  SEM (shaded bands) as a function of a subset of active cells in the maze with and without objects. **E.** Mean BD accuracy (solid lines)  $\pm$  SEM (shaded bands) at each position in the maze with and without objects. The track was divided in two zones: Objects Zone (OZ, in red on the x axis) around the objects and No Object Zone ( $\emptyset$ Z, in grey on the x axis) deprived of objects. Note that the decoding accuracy was specifically improved in OZ in comparison to  $\emptyset$ Z in the maze with objects ( $P < 10^{-6}$ , two-tailed WRS test).

191 The results so far suggest that objects can increase the resolution of hippocampal spatial  
192 representation. To verify this, we next performed position-decoding analysis (Brown et al.,  
193 1998; Zhang et al., 1998) (Fig. 3A). We used the spike trains from all pyramidal cells recorded  
194 (i.e., both the spatially modulated and nonspatially modulated cells) and compared decoded  
195 positions with actual positions of the animal in the virtual linear tracks. Overall, the effect of  
196 objects on hippocampal spatial coding was obvious because the decoding error across trials  
197 was nearly two-fold larger in the track without objects compared to the track with objects  
198 ( $\emptyset$ T:  $46.3 \pm 0.05$  cm,  $n = 180$  trials; OT:  $27.6 \pm 0.12$  cm,  $n = 129$  trials;  $Z = 10.1$ ,  $P < 10^{-23}$ , two-  
199 tailed WRS test; Fig. 3A and B). Accordingly, the decoding accuracy (van der Meer et al.,  
200 2010) was three fold lower in the empty track compared to the track with objects ( $\emptyset$ T:  $0.017$   
201  $\pm 2.8 \times 10^{-5}$ ,  $n = 180$  trials; OT:  $0.053 \pm 2.06 \times 10^{-4}$ ,  $n = 129$  trials; chance level 0.01;  $Z = -13.7$ ,  
202  $P < 10^{-41}$ , two-tailed WRS test; Fig. 3A and C). In both cases, downsampling was performed to  
203 equalize the number of cells used for decoding between the two conditions (20 active cells).  
204 These effects were independent of the decoding method used because similar results were  
205 observed using a Firing Rate Vector (FRV) method (Wilson and McNaughton, 1993;  
206 Middleton and McHugh, 2016). Correlation values were lower in the empty track ( $\emptyset$ T:  $0.63 \pm$   
207  $0.008$ ,  $n = 180$  trials; OT:  $0.74 \pm 0.01$ ,  $n = 129$  trials;  $Z = -8.62$ ,  $P < 10^{-17}$ , two-tailed WRS test)  
208 and decoding errors were higher ( $\emptyset$ T:  $48.4 \pm 0.67$  cm,  $n = 180$  trials; OT:  $33.0 \pm 1.81$  cm,  $n =$   
209  $129$  trials;  $Z = 7.32$ ,  $P < 10^{-12}$ , two-tailed WRS test). Because Bayesian decoding was  
210 performed using a drop cell approach we could measure decoding accuracy for different  
211 sample sizes of active cells (van der Meer et al., 2010) (Fig. 3D). Decoding accuracy was  
212 positively correlated with sample size in the track with objects but not in the track without  
213 objects (Fig. 3D). Importantly, in the track without objects, the decoding accuracy never  
214 reached values observed for the track with objects, even when using a larger set of cells (up  
215 to 45). To see if objects could locally increase spatial decoding accuracy we compared  
216 decoding accuracy between OZ and  $\emptyset$ Z. While decoding accuracy was uniformly low in the  
217 track without objects (OZ:  $0.019 \pm 0.0014$ ,  $n = 30$  spatial bins of 2 cm;  $\emptyset$ Z:  $0.016 \pm 9.25 \times 10^{-4}$ ,  
218  $n = 50$  spatial bins of 2 cm;  $Z = 1.42$ ,  $P = 0.16$ , two-tailed WRS test; Fig. 3E), it was increased  
219 in every part of the track with objects but significantly more in OZ compared to  $\emptyset$ Z (OZ:  
220  $0.063 \pm 0.003$ ,  $n = 30$  spatial bins of 2 cm;  $\emptyset$ Z:  $0.043 \pm 0.002$ ,  $n = 50$  spatial bins of 2 cm;  $Z =$   
221  $4.99$ ,  $P < 10^{-6}$ , two-tailed WRS test; Fig. 3E). We concluded that local visual cues can globally  
222 and locally improve spatial coding accuracy at the population level.

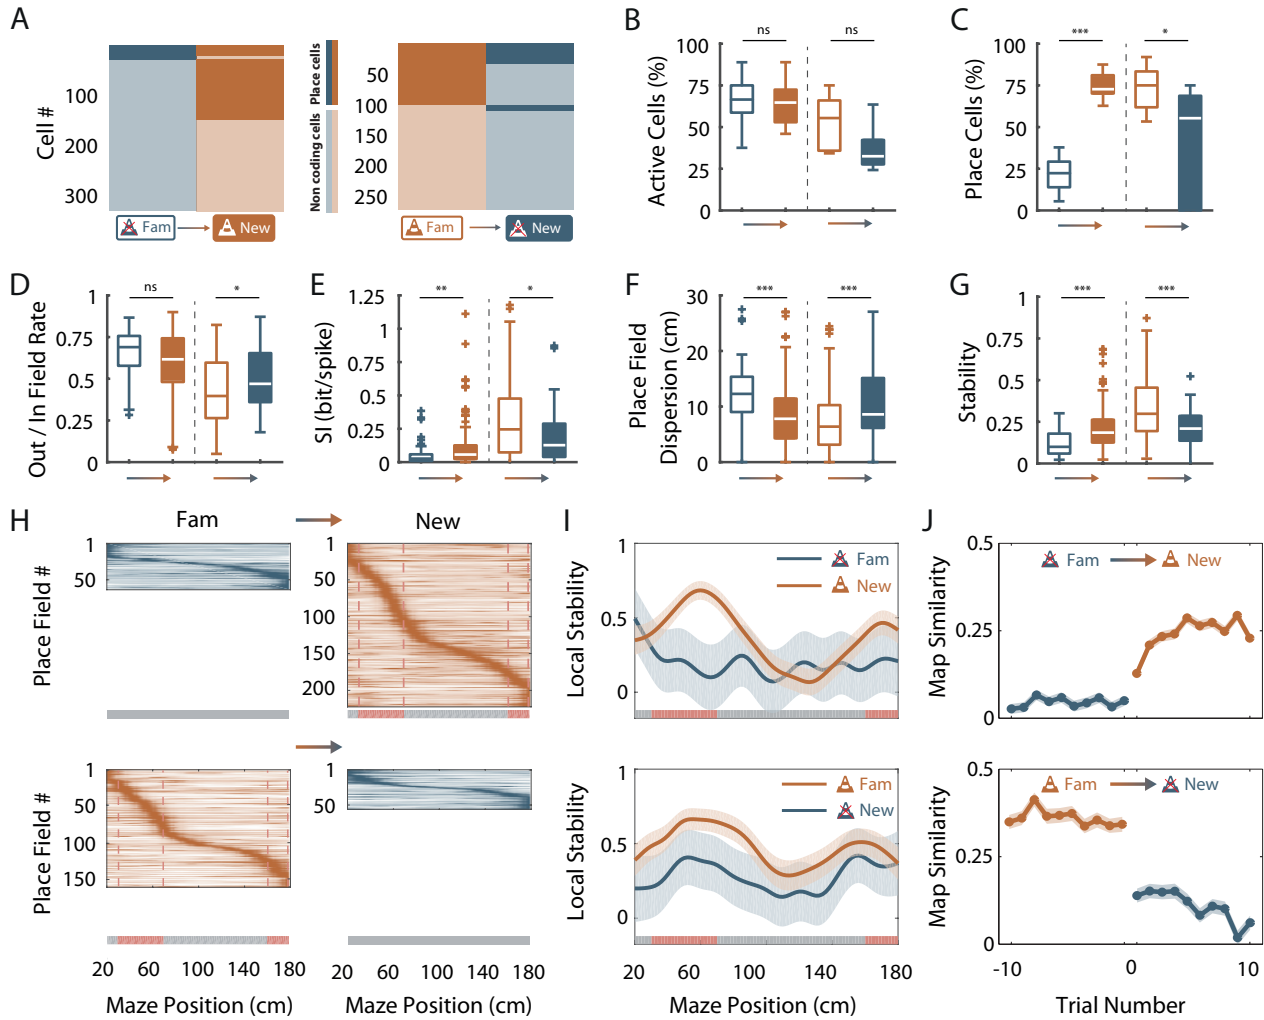

**Figure 4: Effects of online object manipulation**

**A.** Mosaic plots representing the cells classified as place cells (darker orange and blue) or non-coding cells (i.e. silent or active non-coding, lighter orange and blue) in the familiar and the new mazes. **B-G.** Box plots comparing familiar (empty box) and new mazes (filled box) conditions. Two pairs of box plots are illustrated; Left: comparison between the familiar maze without objects (blue,  $\emptyset T_{fam}$ ) and the new maze with objects (orange,  $OT_{new}$ ). Right: comparison between the familiar maze with objects (orange,  $OT_{fam}$ ) and the new maze without objects (blue,  $\emptyset T_{new}$ ). A gradient color arrow shows the way of the transition. Plots show the percentage of active cells (**B**;  $\emptyset T_{fam}$  vs  $OT_{new}$ :  $P = 0.66$ ;  $OT_{fam}$  vs  $\emptyset T_{new}$ :  $P = 0.14$ , two-tailed paired  $t$ -test), the percentage of place cells (**C**;  $P < 10^{-5}$  and  $P = 0.04$ , respectively, two-tailed paired  $t$ -test), the Out/In field firing rate (**D**;  $P = 0.06$  and  $P = 0.047$ , respectively, two-tailed WRS test), the spatial information (SI; **E**;  $P = 0.0014$  and  $P = 0.015$ , respectively, two-tailed WRS test), the place field dispersion (**F**;  $P < 0.0004$  and  $P = 0.0008$ , respectively, two-tailed WRS test) and the stability index (**G**;  $P < 10^{-5}$  and  $P = 0.0002$ , respectively, two-tailed WRS test). **H.** Color-coded mean firing rate maps of place fields recorded in the familiar and new mazes. The color codes for the intensity of the firing rate normalized by the peak rate. The place fields are ordered according to the position of their peak rate in each track (the reward zones are excluded). The tracks were divided into Objects Zones (OZ, in red on the x-axis) around the objects and No Object Zones ( $\emptyset Z$ , in grey on the x-axis) deprived of objects. Red dotted lines depict the boundaries of the OZ in the track with objects. **I.** Mean local stability index (solid orange or blue lines)  $\pm$  SEM (blue or orange shaded areas) at each spatial bin in the familiar and new mazes (top: from  $\emptyset T_{fam}$  to  $OT_{new}$ ; bottom: from  $OT_{fam}$  to  $\emptyset T_{new}$ ). **J.** Map similarity (see Material and Methods) for 10 trials before and 10 trials after the experimental manipulation (indicated by 0) for  $\emptyset T_{fam}$  to  $OT_{new}$  (top) and for  $OT_{fam}$  to  $\emptyset T_{new}$  condition (bottom).

223

## 224 **Effects of online virtual objects manipulation**

225 Place cells usually appear instantaneously upon exploration of a new environment in area  
226 CA1 (Wilson and McNaughton, 1993). To see if similar dynamics could be observed for the  
227 effects of virtual objects on spatial resolution we manipulated objects online while recording  
228 the same ensemble of cells in area CA1. For mice trained in an empty track, we  
229 instantaneously added the three objects (which were thus new to the mice) after 20 back  
230 and forth trials. Conversely, for mice trained in the track with objects we instantaneously  
231 removed the three objects. Objects manipulation had no effect on the proportion of active  
232 cells (Fig. 4B) but a strong impact on the proportion of place cells (Fig. 4A and C). For mice  
233 trained in an empty track, adding objects instantaneously increased the proportion of place  
234 cells (from  $21.6 \pm 5.3\%$  to  $75.0 \pm 4.1\%$ ;  $n = 5$  sessions in 3 mice;  $t_4 = -35.8$ ,  $P < 10^{-5}$ , two-tailed  
235 paired  $t$ -test; Fig. 4A and C). Thus, a large proportion of cells initially silent or active but  
236 nonspatially modulated in the familiar empty track became spatially modulated (40.3%).  
237 Most of these cells had on-track fields (81.3%; Fig. 4H). A majority of cells initially spatially  
238 modulated remained place cells (75.7%) while the others became nonspatially modulated or  
239 silent. Adding objects also increased place cells' spatial information ( $Z = -3.20$ ,  $P = 0.0014$ ,  
240 two-tailed WRS test; Fig. 4E) and stability ( $Z = -4.68$ ,  $P < 10^{-5}$ , two-tailed WRS test; Fig. 4G).  
241 Local stability was significantly higher in OZ when objects were added (OZ:  $0.56 \pm 0.02$ ,  $n =$   
242 60 bins of 2 cm, 30 in each direction;  $\emptyset Z$ :  $0.25 \pm 0.02$ ,  $n = 100$  bins of 2 cm, 50 in each  
243 direction;  $Z = -8.56$ ,  $P < 10^{-16}$ , two-tailed WRS test; Fig. 4I) but not before ( $t_{158} = 0.15$ ,  $P =$   
244 0.88, two-tailed unpaired  $t$ -test). Place fields' out/in field firing ratio and dispersion were  
245 instantaneously decreased ( $Z = 1.86$ ,  $P = 0.06$  and  $Z = 3.55$ ,  $P = 0.0004$ , respectively, two-  
246 tailed WRS test; Fig. 4D and F). On the other hand, removing objects decreased the  
247 proportion of place cells (from  $73.1 \pm 6.62\%$  to  $39.4 \pm 16.4\%$ ,  $n = 5$  sessions in 2 mice;  $t_4 =$   
248 2.94,  $P = 0.04$ , two-tailed paired  $t$ -test; Fig. 4A and C). The spatial information and stability  
249 were decreased by this manipulation ( $Z = 2.44$ ,  $P = 0.015$  and  $Z = 3.72$ ,  $P = 0.0002$ ,  
250 respectively, two-tailed WRS test; Fig. 4E and G) while place field out/in field firing ratio and  
251 dispersion were increased ( $Z = -1.99$ ,  $P = 0.047$  and  $Z = -3.31$ ,  $P = 0.0008$ , respectively, two-  
252 tailed WRS test; Fig. 4D and F). However, even after object removal, local stability was still  
253 significantly higher in OZ (OZ:  $0.34 \pm 0.02$ ,  $n = 60$  bins of 2 cm, 30 in each direction;  $\emptyset Z$ :  $0.24$   
254  $\pm 0.02$ ,  $n = 100$  bins of 2 cm, 50 in each direction;  $t_{158} = -3.7$ ,  $P = 0.0003$ , two-tailed unpaired



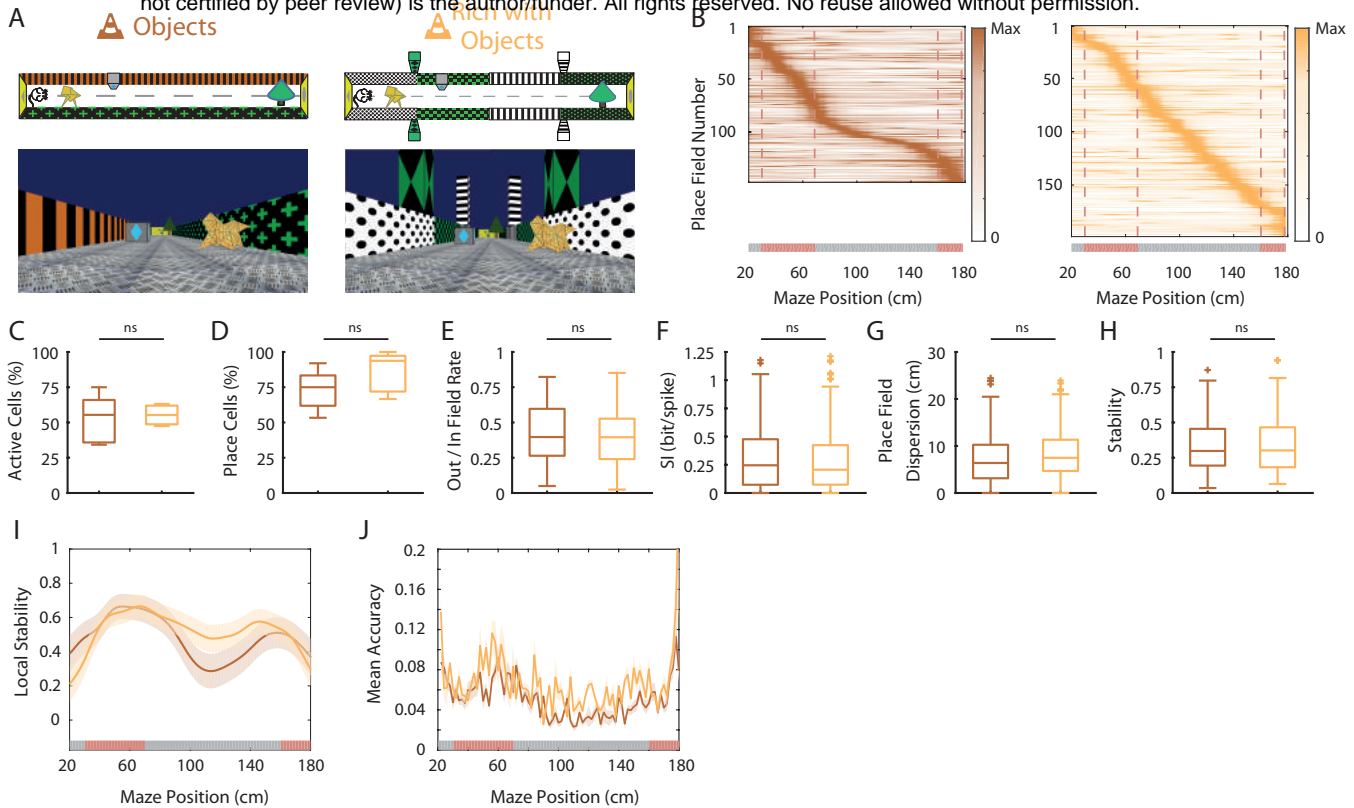

**Figure 5: Effects of virtual 3D objects in a visually enriched environment**

**A.** Schema (top) and picture (bottom) representing the original maze with objects (left) and a visually enriched maze with objects (right). **B.** Color-coded mean firing rate maps for all place fields recorded in the original maze with objects (orange, left) and on the visually rich maze with objects (yellow, right). The color codes for the intensity of the firing rate normalized by the peak rate. The place fields are ordered according to the position of their peak rate in each track (the reward zones are excluded). The tracks were divided into Objects Zones (OZ, in red on the x-axis) around the objects and No Object Zones ( $\emptyset$ Z, in grey on the x-axis) deprived of objects. Red dotted lines depicts the boundaries of the OZ. **C-H.** Box plots representing in the original (orange) and visually rich (yellow) maze with objects the percentage of active cells (**C**;  $P = 1$ , two-tailed WRS test), the percentage of place cells (**D**;  $P = 0.20$ , two-tailed unpaired  $t$ -test), the out/in field rate (**E**;  $P = 0.57$ , two-tailed WRS test), the spatial information (SI; **F**;  $P = 0.67$ , two-tailed WRS test), the place field dispersion (**G**;  $P = 0.06$ , two-tailed WRS test) and the stability index (**H**;  $P = 0.95$ , two-tailed WRS test). **I.** Mean local stability index (solid orange or yellow lines)  $\pm$  SEM (orange or yellow shaded bands) at each position's bin in the original (orange) and visually rich (yellow) mazes. **J.** Mean BD accuracy (solid lines)  $\pm$  SEM (shaded bands) at each spatial bin in the original maze with objects (orange) or in the visually rich maze with objects (yellow).

255 *t*-test; Fig. 4I). We conclude that the effects of local visual cues on place cells' coding  
256 observed between familiar tracks can be reproduced with instantaneous objects  
257 manipulation.

258 We next investigated the dynamic of these changes by correlating the firing rate  
259 maps of each back and forth trial with the corresponding average firing rate map in the  
260 condition with objects (the most stable condition) for 10 trials before (t-1 to t-10) and 10  
261 trials after (t+1 to t+10) the manipulation (Fig. 4J). When objects were added in the empty  
262 track, map similarity was significantly higher for the second trial in the new condition (t-1 vs  
263 t+1, n = 598 pyramidal cells;  $Z = 3.49$ ,  $P = 0.09$ ; t+1 vs t+2, n = 614 pyramidal cells;  $Z = 3.71$ ,  $P$   
264 = 0.04; Kruskal-Wallis one-way test with post-hoc Bonferroni test) and then stayed higher  
265 from this second trial on (t+2 vs t+3, n = 608 pyramidal cells;  $P = 1$ , Kruskal-Wallis one-way  
266 test with post-hoc Bonferroni test). Conversely, when objects were removed from the  
267 familiar track with objects, map similarity dropped already for the first trial in the new  
268 condition (t-1 vs t+1, n = 380 pyramidal cells;  $P < 10^{-8}$ , Kruskal-Wallis one-way test with post-  
269 hoc Bonferroni test) and stayed lower from this first trial on (t+1 vs t+2, n = 380 pyramidal  
270 cells;  $P = 1$ , Kruskal-Wallis one-way test with post-hoc Bonferroni test). Thus, the  
271 hippocampus can rapidly adapt its spatial coding resolution to local visual cues available in  
272 the environment.

273

## 274 **Low proportion of landmark vector cells in OT**

275 Newly activated place cells could correspond to landmark vector (LV) cells, which have been  
276 recorded in the hippocampus of freely moving rats (Deshmukh and Knierim, 2013) and head-  
277 fixed mice running on a treadmill (Geiller et al., 2017). These cells tend to discharge  
278 systematically near objects present in the environment or landmarks on the treadmill. To  
279 test this hypothesis, we specifically looked for LV cells in our recordings. On individual  
280 unidirectional trials the presence of LV cells firing near a specific object would be difficult to  
281 disentangle from the firing of a place cell which happen to have a place field near that object  
282 by chance. Because LV cells tend to systematically discharge near objects, these cells should  
283 discharge near the same object (s) in both back and forth trials. We thus used back and forth  
284 trials to address this point. We defined object zones for each individual object (IOZ, which  
285 were enlarged on the side from which animals were approaching the object to take into  
286 account the anticipatory nature of some LV cells (Geiller et al., 2017). Place cells were



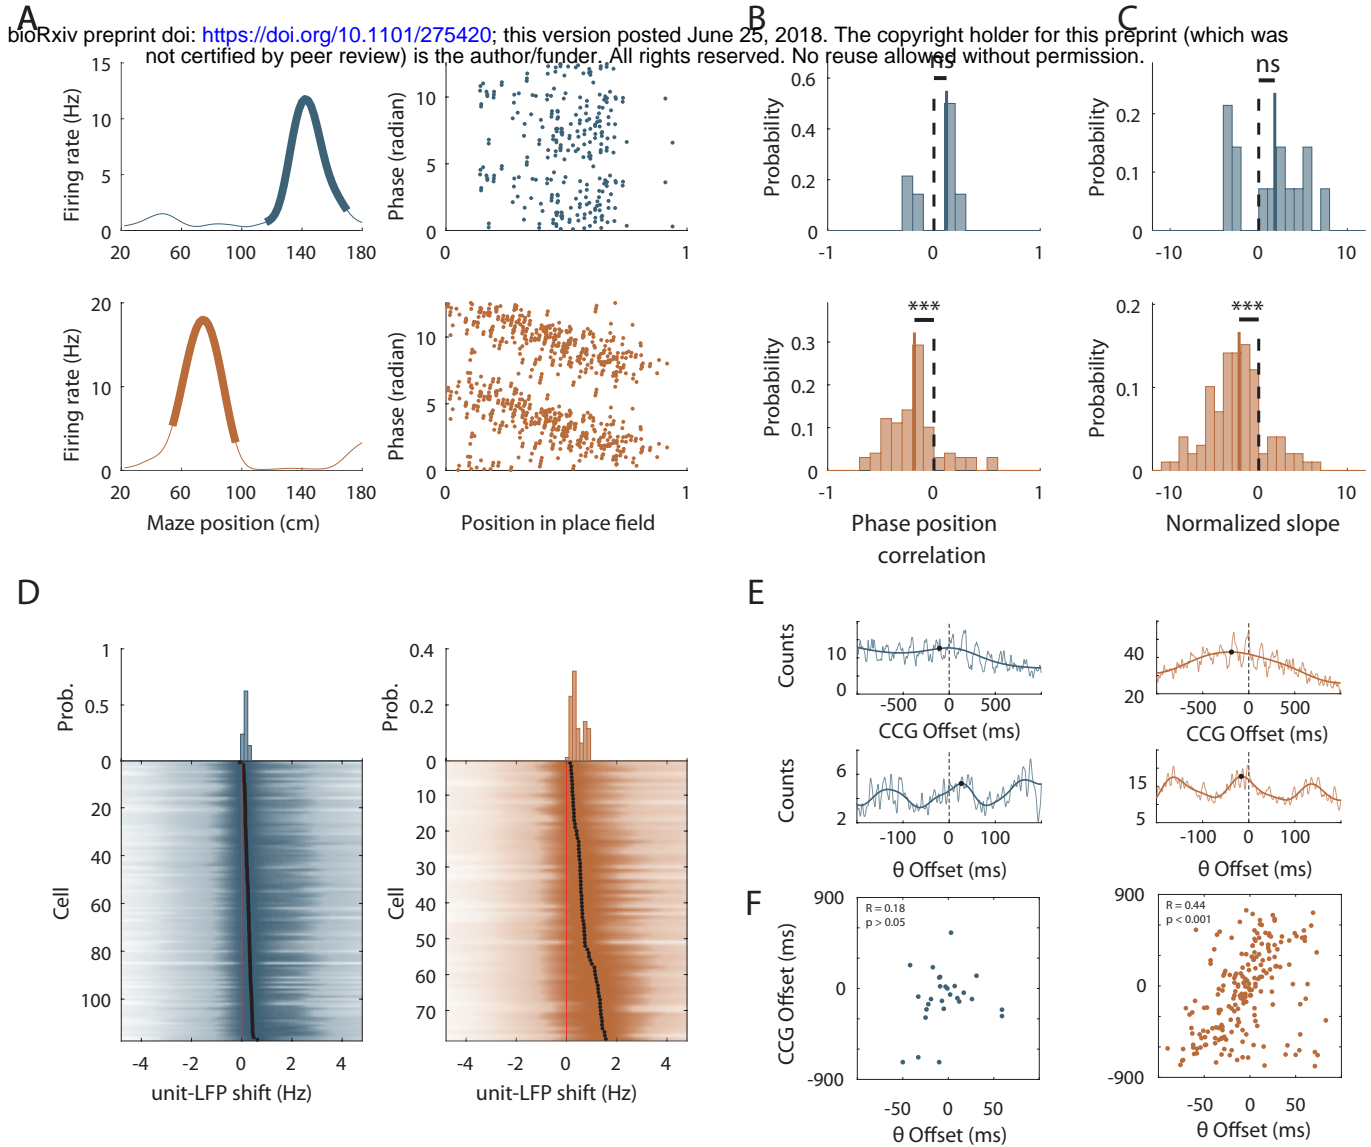

## Figure 6: Importance of local visual cues for hippocampal temporal coding

**A.** Left: Mean firing rate maps of representative CA1 place cells with place fields highlighted by a bold line (left) recorded in the maze without objects (top, only spatially stable trials see Material and Methods section) and with objects (bottom). Right: spikes phase (radian) versus position in the corresponding place fields. **B-C.** Distribution of significant phase position correlation (**B**) and slopes (**C**) in the condition without objects (top; correlation:  $P = 0.42$ ; slopes:  $P = 0.4$ , one-sample sign-test) and with objects (bottom; correlation:  $P < 10^{-11}$ ; slopes:  $P < 10^{-11}$ , one-sample sign-test). The median of the distribution is indicated by a bold line and 0 by a dotted line. **D.** Color-coded cross-correlogram between the power spectra of neuronal spikes and LFP for each theta-modulated cell recorded on the maze without (bottom left, blue) and with (bottom right, orange) objects. Black dots indicate the maximum of each cross-correlation. Each cross-correlation is normalized by its maximum. Top: Distribution of the maximum cross-correlations used to quantify the frequency shift for all the cells. **E.** Examples of cross-correlograms computed for two pairs of place cells with overlapping place fields at the behavioral (top) or theta time scale (bottom, see Methods) in order to quantify Cross-Correlogram (CCG) and theta Offsets respectively in no object (blue; left) or object (orange; right) conditions. **F.** Relationship between 'CCG' and 'theta' offsets in the cross-correlograms of all the spikes in overlapping place fields of neuron pairs recorded in no object (top; blue;  $R = 0.18$ ,  $P = 0.377$ , Pearson correlation) and object condition (bottom; orange;  $R = 0.44$ ,  $P < 0.001$ , Pearson correlation).

287 classified as LV cells if they were bidirectional (firing in back and forth trials) and had one or  
288 more place field(s) in an IOZ corresponding to the same object for back and forth trials. In  
289 the track without objects no LV cells were detected. In the track with objects, LV  
290 represented only 6.79% of all place cells. This corresponds to the proportion of LV cells  
291 recorded in area CA1 in the presence of real objects (Deshmukh and Knierim, 2013). Thus,  
292 the vast majority of newly activated place cells in the presence of objects does not behave  
293 like LV cells.

294

### 295 **Effects of virtual objects in a visually enriched environment**

296 We next wondered whether the hippocampal mapping resolution was maximal in the  
297 presence of objects or whether it could be further increased by visually enriching the  
298 environment. We thus analyzed hippocampal place cells' coding in another environment  
299 containing the original 3D objects but enriched in visual cues such as different wall patterns  
300 in different positions along the track and high 3D columns outside the track (EOT,  $n = 3$  mice;  
301 Fig. 5A). The percentage of active cells was not increased by visually enriching the  
302 environment (OT,  $n = 5$  sessions in 2 mice; EOT,  $n = 5$  sessions in 3 mice;  $Z = -0.1$ ,  $P = 1$ , two-  
303 tailed WRS test; Fig. 5C) nor was the percentage of place cells (OT,  $n = 5$  sessions in 2 mice;  
304 EOT,  $n = 5$  sessions in 3 mice;  $t_8 = -1.38$ ,  $P = 0.20$ , two-tailed unpaired  $t$ -test; Fig. 5B-D).  
305 However, place fields were uniformly distributed along the track in the visually rich  
306 environment ( $n = 16$  spatial bins of 10 cm;  $P = 0.23$ , test for non-uniformity), thus not  
307 clustered around objects as in the visually poor environment (Fig. 5B). This suggests that  
308 local visual cues are important to set place fields' position (Renaudineau et al., 2007).  
309 However, all other attributes of place fields were not significantly different between the two  
310 environments (OT,  $n = 103$  place cells; EOT,  $n = 132$  place cells; out/in field firing ratio:  $Z =$   
311  $0.57$ ,  $P = 0.57$ ; Spatial info:  $Z = 0.42$ ,  $P = 0.67$ ; Dispersion:  $Z = -1.88$ ,  $P = 0.06$ ; Stability:  $Z = -$   
312  $0.06$ ,  $P = 0.95$ ; two-tailed WRS test for all; Fig. 5E-H). When looking at local stability of firing  
313 rates, we still observed a significant effect of objects in the visually enriched environment in  
314 OZ versus  $\emptyset$ Z (OZ,  $n = 60$  spatial bins of 2 cm;  $\emptyset$ Z:  $n = 100$  spatial bins of 2 cm;  $Z = -2.46$ ,  $P =$   
315  $0.014$ , two-tailed WRS test; Fig. 5I). Interestingly, positions near objects were also decoded  
316 with a better accuracy using a Bayesian decoder than positions further away in the visually  
317 enriched environment (OZ:  $0.08 \pm 0.007$ ,  $n = 30$  spatial bins of 2 cm;  $\emptyset$ Z:  $0.059 \pm 0.002$ ,  $n =$   
318  $50$  spatial bins of 2 cm;  $Z = 3.08$ ,  $P = 0.002$ , two-tailed WRS test; Fig. 5J). Altogether these

319 results suggest that in the presence of local visual cues, hippocampal spatial coding is not  
320 further improved by visually enriching the environment. However, place fields locations are  
321 influenced by additional visual cues along the track. Interestingly, despite a homogeneous  
322 distribution of place field locations, 3D objects could still locally influence hippocampal  
323 population decoding accuracy.

324

### 325 **Hippocampal phase precession is strongly reduced in the absence of virtual** 326 **3D objects**

327 The results so far suggest that local 3D objects can increase spatial coding resolution when  
328 considering the spatial firing rate code. Place cells however do not only increase their firing  
329 rate inside the place field but also tend to fire at progressively earlier phases of the theta  
330 oscillation as an animal moves through the place field (O'Keefe and Recce, 1993). This  
331 phenomenon, called theta phase precession, is thought to further increase spatial coding  
332 resolution because different locations within the place field that are difficult to distinguish  
333 based on firing rate alone can be accurately separated when phase is taken into account. In  
334 the temporal domain, increased spatial resolution would thus correspond to increased slope  
335 of the phase versus position relationship for identical field sizes.

336 We first looked for differences in the theta oscillation recorded in the Local Field  
337 Potential (LFP) between the two conditions. The mean frequency of the field theta  
338 oscillation was not significantly different when mice were running in the track with or  
339 without objects ( $\emptyset T$ :  $6.79 \pm 0.12$  Hz,  $n = 9$  sessions in 3 mice; OT:  $6.77 \pm 0.10$  Hz,  $n = 5$   
340 sessions in 2 mice;  $Z = 1.14$ ,  $P = 0.30$ , two-tailed WRS test) but was lower than that reported  
341 for mice navigating in real linear tracks (Middleton and McHugh, 2016). The power of theta  
342 oscillation (theta index see Materials and methods section) was also not significantly  
343 different ( $\emptyset T$ :  $3.31 \pm 0.23$ ,  $n = 9$  sessions in 3 mice; OT:  $3.55 \pm 0.22$ ,  $n = 5$  sessions in 2 mice;  
344  $t_{12} = -0.69$ ,  $P = 0.50$ , two-tailed unpaired  $t$ -test). Theta frequency was not modulated by  
345 running speed of the animal in  $\emptyset T$  ( $r = 0.02 \pm 0.02$ ,  $n = 9$  sessions in 3 mice; Figure 6- figure  
346 supplement 1A, C) as previously observed in virtual linear tracks when only distal cues are  
347 present (Ravassard et al., 2013). Theta frequency-speed modulation was however significant  
348 in OT ( $r = 0.14 \pm 0.03$ ,  $n = 5$  sessions in 2 mice;  $t_{12} = -2.99$ ,  $P = 0.01$ , two-tailed unpaired  $t$ -  
349 test; Figure 6- figure supplement 1A, C). In contrast, theta amplitude was similarly

350 modulated by running speed in both conditions ( $\emptyset$ T:  $r = 0.06 \pm 0.03$ ,  $n = 9$  sessions in 3 mice;  
351 OT:  $r = 0.1 \pm 0.04$ ,  $n = 5$  sessions in 2 mice;  $t_{12} = 0.12$ ,  $P = 0.9$ , two-tailed unpaired  $t$ -test;  
352 Figure 6- figure supplement 1B, D). The proportion of active putative pyramidal cells with  
353 significant theta modulation was not different between conditions ( $\emptyset$ T: 92.8%,  $n = 361$  active  
354 cells; OT: 90.3%,  $n = 155$  active cells;  $\chi^2 = 0.91$ ,  $df = 1$ ,  $P = 0.34$ , Chi-Square test). The coupling  
355 of spikes to theta oscillation was also not significantly different between conditions in terms  
356 of preferred phase ( $\emptyset$ T:  $200.26^\circ \pm 2.6$ ,  $n = 361$  active cells; OT:  $198.66^\circ \pm 4.12$ ,  $n = 155$  active  
357 cells;  $F = 0.08$ ,  $P = 0.77$ , circular ANOVA; Figure 6-figure supplement 2A, B) and strength  
358 (mean resultant vector length  $\emptyset$ T:  $0.18 \pm 0.006$ ,  $n = 361$  active cells; OT:  $0.19 \pm 0.009$ ,  $n = 155$   
359 active cells;  $Z = -1.63$ ,  $P = 0.1$ , two-tailed WRS test; Figure 6-figure supplement 2A, C).

360 We then analyzed place cells' theta phase precession. To compensate for decreased  
361 spatial stability in the  $\emptyset$ T condition we took into account only trials with good correlation  
362 with the average place fields (Spatially Stable Trials or SST) for place cells recorded in the  
363 empty track (Schlesiger et al., 2015), but included all trials for place cells recorded in the  
364 track with objects. The stability index of SST fields in  $\emptyset$ T was not significantly different from  
365 the stability index of all fields in OT ( $\emptyset$ T,  $n = 52$  SST fields; OT,  $n = 151$  fields;  $Z = 0.18$ ,  $P =$   
366  $0.86$ , two-tailed WRS test). The percentage of fields with significant ( $P < 0.05$ ) and negative  
367 correlation between phase and position (i.e., precessing fields) was high in the track with  
368 objects (41.9%), comparable to that observed in real linear tracks in mice but low in the  
369 empty track (8%;  $\chi^2 = 15.21$ ,  $df = 1$ ,  $P < 10^{-4}$  compared to OT, Chi-Square test). Accordingly, the  
370 correlation between phase and position was significantly different from zero for place cells  
371 recorded in the track with objects ( $r = -0.18 \pm 0.018$ ,  $n = 99$  fields;  $P < 10^{-11}$ , one sample sign-  
372 test; Fig. 6A and B) but not for those recorded in the track without objects ( $r = 0.03 \pm 0.026$ ,  
373  $n = 14$  fields;  $P = 0.42$ , one sample sign-test; Fig. 6A and B). Moreover, phase precession  
374 slopes (calculated on normalized place field sizes) were negative and significantly different  
375 from 0 for cells recorded in the track with objects ( $-2.43 \pm 0.23$  rad/U,  $n = 99$  fields;  $P < 10^{-11}$ ,  
376 one sample sign-test; Fig. 6C) but not in the track without objects ( $1.18 \pm 0.50$  rad/U,  $n = 14$   
377 fields;  $P = 0.4$ , one sample sign-test; Fig. 6C).

378 In the track without objects, the decrease in phase-position correlation could result  
379 from the higher inter-trial spatial dispersion, which could lead to spikes at different theta  
380 phases for identical positions. To assess this possibility, we performed phase-precession  
381 analysis on single-trial-detected fields and averaged the slopes of individual passes (Schmidt

382 et al., 2009). The correlation was still negative and significantly different from 0 in OT ( $r = -$   
383  $0.19 \pm 0.29$ ,  $n = 92$  single-trial fields;  $t_{91} = -4.53$ ,  $P < 10^{-4}$ , one sample  $t$ -test) but not in  $\emptyset T$  ( $r =$   
384  $-0.004 \pm 0.03$ ,  $n = 35$  single-trial fields;  $t_{34} = -0.92$ ,  $P = 0.92$ , one sample  $t$ -test). Similarly, the  
385 slope of the regression line was negative and significantly different from 0 in OT ( $-2.27 \pm 0.56$   
386  $\text{rad/U}$ ,  $n = 92$  single-trial fields;  $P = 0.004$ , sign-test) but not in  $\emptyset T$  ( $0.79 \pm 0.56$ ,  $n = 35$  single-  
387 trial fields;  $P = 0.73$ , sign-test).

388 Because a low percentage of active cells were place cells in the track without objects,  
389 we ran an additional analysis that is independent of place field detection. It exploits the fact  
390 that phase precessing cells emit theta paced spikes at a frequency slightly faster than the  
391 concurrent LFP theta oscillation (O'Keefe and Recce, 1993). We performed cross-correlation  
392 between the power spectra of neuronal spikes and LFP for all active cells with significant  
393 theta modulation of spiking activity ( $\emptyset T$ : 117/342 cells = 34.2%; OT: 78/142 cells = 54.9%;  $\chi^2$   
394 = 17.9,  $df = 1$ ,  $P < 10^{-4}$ , Chi-square test) and compared the frequency shift ( $>0$ ) between  
395 spiking and LFP theta oscillations between the two conditions (Geisler et al., 2007) (Fig. 6D).  
396 The shift was significantly higher in the OT ( $0.72 \pm 0.05$  Hz,  $n = 78$  active cells. Fig. 6D) versus  
397  $\emptyset T$  ( $0.26 \pm 0.01$  Hz,  $n = 117$  active cells;  $Z = -8.73$ ,  $P < 10^{-17}$ , two-tailed WRS test; Fig. 6D).  
398 Altogether, these results suggest that local visual cues are important for proper theta phase  
399 precession in the hippocampus.

400 To further investigate the effect of local visual cues on temporal coding we next  
401 focused on theta-timescale spike coordination. Previous studies have reported, for place  
402 cells with overlapping place fields, a positive correlation between the physical distance  
403 separating their place fields' centers and the time (or phase) lag of their spikes within  
404 individual theta cycles (Skaggs et al., 1996; Dragoi and Buzsáki, 2006). Our analysis revealed  
405 a strong correlation between theta phase and physical distance in the presence of virtual 3D  
406 objects (OT:  $R = 0.44$ ,  $n = 214$  pairs in 2 mice;  $P < 10^{-10}$ , Pearson correlation; Fig. 6E, F) but not  
407 otherwise ( $\emptyset T$ :  $R = 0.18$ ,  $n = 27$  pairs in 3 mice;  $P = 0.38$ , Pearson correlation; Fig. 6E, F).  
408 These results show that local visual cues are important for temporal coding in the  
409 hippocampus beyond theta phase precession.

410  
411  
412

## 413 Discussion

414 Our study aimed at determining whether local sensory cues could influence hippocampal  
415 spatial coding resolution. We found that local sensory cues could increase spatial coding  
416 resolution through an increase in the proportion of spatially selective place cells among  
417 active cells but also enhanced place fields' spatial selectivity and stability. These effects were  
418 local within the same environment and dynamic upon cue manipulations. Local sensory cues  
419 also proved to be important for temporal place cell coding such as theta phase precession  
420 and theta timescale spike coordination.

421         Spatial resolution can be improved by pooling information across neurons (Wilson  
422 and McNaughton, 1993). We found that local visual cues could dramatically increase the  
423 number of place cells among active cells (by a 3-fold factor). The mechanisms of place cell  
424 activation are not fully understood. Using sensory-based models of place cells activation  
425 (Hartley et al., 2000; Strösslin et al., 2005; Barry et al., 2006; Sheynikhovich et al., 2009) one  
426 can predict that an increase in the quantity/quality of sensory cues in an environment will  
427 enhance the number of place cells coding that environment (Geva-Sagiv et al., 2015).  
428 However, previous studies using local enrichment with multimodal sensory cues or real  
429 objects reported only weak or no effects on dorsal hippocampal cell activity. One study  
430 recording in rats navigating between cue rich and cue poor parts of the same track reported  
431 no effect on the proportion of place cells or on the density of place fields (Battaglia, 2004).  
432 Furthermore, population vector analysis did not reveal a better disambiguation of nearby  
433 locations in the cue rich part of the track compared to the cue poor suggesting similar spatial  
434 coding resolution (Battaglia, 2004). Others studies found no overall increase of place cells  
435 proportion in 2D environment containing real objects nor a specific bias for place cells to fire  
436 near the objects (Renaudineau et al., 2007; Deshmukh and Knierim, 2013). One possibility to  
437 explain the lack of recruitment of additional cells in these studies could be a high  
438 recruitment rate of the dorsal hippocampus even in the "cue poor" condition due to the  
439 presence of uncontrolled local cues (Ravassard et al., 2013).

440         We found that place field density was specifically increased near objects. However,  
441 studies so far have revealed an homogeneous allocation of place fields in space (Muller et  
442 al., 1987; Rich et al., 2014) in a given environment. Locally activated place cells could  
443 correspond to landmark vector (LV) cells, which tend to discharge unspecifically near several



444 objects or landmarks in a given environment. However, the proportion of these cells is  
445 generally low in the dorsal hippocampus (between 6-8 %) which is in line with the fact that  
446 places near real objects are not overrepresented at the population level. We note however  
447 that this proportion may vary depending on the recording location along both the proximo-  
448 distal axis and radial axis. For example, the distal part of CA1, closer to the subiculum, is  
449 more heavily innervated by the lateral entorhinal cortex where LV cells were first discovered  
450 (Deshmukh and Knierim, 2011) and which is believed to feed information about the “what”  
451 visual stream to the hippocampus (Knierim et al., 2013). Extracellular recordings specifically  
452 targeting this area in the intermediate hippocampus reported an increased proportion of  
453 place cells in the presence of objects (Burke et al., 2011). Whether virtual objects are  
454 perceived by mice as real objects is unclear. They notably lack the multisensory component  
455 inherent to real objects (Connor and Knierim, 2017). Nevertheless, they triggered a large  
456 (50%) increase in place cell’s proportion which is not compatible with the modest proportion  
457 of LV cells reported in our and previous studies.

458         Instead, our results are more compatible with the hippocampal mapping system  
459 using local visual cues to improve its spatial coding resolution. Consistent with this  
460 hypothesis, spatial coding was not only quantitatively but also qualitatively increased with a  
461 higher spatial selectivity, spatial information content and stability of place fields. Previous  
462 studies have reported overrepresentations near rewarded location (O’Keefe and Conway,  
463 1978; Hollup et al., 2001; Dupret et al., 2010; Danielson et al., 2016; Sato et al., 2018) or  
464 specific sensory cues (Wiener et al., 1989; Hetherington and Shapiro, 1997; Sato et al.,  
465 2018). Importantly we could also observe overrepresentations of the ends of the maze in  $\emptyset T$ ,  
466 where rewards are delivered and which are associated with prominent visual cues.  
467 Nevertheless, End-track fields had a low spatial information content and stability when  
468 compared to fields recorded in OT (but similar to On-track fields recorded in the same  
469 maze). This argues against increased spatial coding resolution at these locations and further  
470 suggests a possible dissociation between overrepresentation and increased spatial coding  
471 resolution. Finally, improved coding resolution near objects could be instantaneously tuned  
472 upon object manipulation while overrepresentations of specific sensory stimuli or rewarded  
473 locations usually takes several days to develop (Le Merre et al., 2018; Sato et al., 2018).

474         A previous study specifically compared place cell coding in real and virtual reality  
475 environments with distal visual cues only in rats (Ravassard et al., 2013). They reported a

476 lower number of spatially modulated cells and lower spatial selectivity in the virtual  
477 environment and concluded that distal visual cues alone are not sufficient to fully engage  
478 the hippocampal mapping system. Our results complement this study by showing that local  
479 visual cues, on the other hand, can increase the proportion of spatially modulated cells (i.e.  
480 place cells) among active cells and spatial selectivity. Several factors could explain the  
481 specific effect of local visual cues on spatial coding observed in the present study. First,  
482 objects could constitute a stable reference point in space to refine estimation of the current  
483 subject's position possibly through anchoring of the path integrator system (McNaughton et  
484 al., 2006; Poucet et al., 2015). Close to the objects, this effect could be further reinforced  
485 through motion parallax effect. Second, objects as local visual cues have a higher sensory  
486 resolution compared to distal visual cues. This can lead to increased spatial coding resolution  
487 according to sensory based models of place cell activation (Hartley et al., 2000; Strösslin et  
488 al., 2005; Barry et al., 2006). Accordingly, animals tend to increase their sensory sampling  
489 rate in order to get a better sensory resolution near important locations (Geva-Sagiv et al.,  
490 2015). Third, objects as salient cues in the environment could modify the attentional state of  
491 the animal and favor spatial awareness. Such rise in attention has been shown to increase  
492 spatial selectivity in mice (Kentros et al., 2004). However, we note that animals were not  
493 required to pay close attention to objects locations to perform the task, as task performance  
494 was not different between the  $\emptyset$ T and OT conditions. Alternatively, objects could represent  
495 a source of additional noise in the system thus requiring a higher number of spatially  
496 modulated cells and increased spatial selectivity for efficient position coding. However,  
497 position decoding was very poor in the maze without objects, which argues against this  
498 possibility.

499 The effects of local cues on spatial coding accuracy were even more pronounced in  
500 the temporal domain. Indeed, in the absence of local cues theta phase precession was  
501 strongly reduced as observed in rat running in place on a wheel (Hirase et al., 1999) despite  
502 the presence of place fields. When local cues were included, however, hippocampal place  
503 cells precessed at a rate comparable to that observed in real environments (Middleton and  
504 McHugh, 2016). To ascertain that this effect did not result from changes in place fields'  
505 quality, additional analysis, independent of place fields' detection, were performed (Geisler  
506 et al., 2007). These analyses also showed that in the presence of local cues individual cells'  
507 firing tended to oscillate faster than theta oscillation recorded in the LFP, a sign of theta



508 phase precession while this was much less the case in the absence of local cues. Importantly  
509 the frequency and power of the theta oscillation recorded in the LFP and the coupling of  
510 putative pyramidal cells' firing to this oscillation were also not significantly different  
511 between conditions and cannot explain observed differences. The only difference was an  
512 attenuation of theta frequency speed modulation in the absence of local cues while theta  
513 amplitude vs speed modulation was equivalent in both conditions. A similar absence of theta  
514 frequency vs speed modulation (with intact theta amplitude vs speed modulation) was  
515 observed in rats navigating virtual reality environments in the absence of local visual cues  
516 (Ravassard et al., 2013). However, in this study, theta phase precession was unaffected.  
517 Thus, the link between an absence of theta frequency vs speed modulation and reduced  
518 theta phase precession is not straightforward. Future studies are needed to decipher the  
519 mechanisms of the effect of local cues on theta phase precession. Theta phase precession is  
520 thought to be involved in the generation of theta sequences, where the time lags between  
521 spikes of place cells with overlapping place fields are proportional to the distance separating  
522 those fields. This so-called theta sequence compression is thought to be important for  
523 spatial memory. Here we found that theta timescale coordination could be observed in the  
524 presence of 3D objects only. This suggests that local sensory cues are important for temporal  
525 coding beyond theta phase precession.

526         Altogether, our results show enriching an environment with local visual cues allows  
527 coding at higher spatial resolution with a high number of spatially modulated cells, smaller  
528 firing fields, increased spatial selectivity and stability and good theta phase precession/theta  
529 timescale spike coordination. The use of virtual reality raises a growing interest in the field of  
530 neuroscience to study spatial cognition in rodents but also in non-human and human  
531 primates (Epstein et al., 2017). Our results suggest that enriching these environments with  
532 local visual cues could help comparing spatial coding in real and virtual environments.

533         We observed that local visual cues induce a rescaling of spatial coding which is both  
534 global and local. What would be the benefit of this rescaling? In the wild, rodents can travel  
535 kilometers away from their home to food locations through empty fields (Taylor, 1978).  
536 Mapping all parts of explored environment at high resolution would require a very large  
537 number of neurons and computational power (Geva-Sagiv et al., 2015). Accordingly, place  
538 fields tend to be larger in bigger environments (Fenton et al., 2008) and the statistics of new  
539 place cells recruitment as an environment becomes bigger are non-uniform (Rich et al.,

540 2014). Thus there might be a computational benefit to be able to map at high resolution  
541 important places like home base or food locations and to map at lower resolution long  
542 transition routes between those locations (Geva-Sagiv et al., 2015). Such resolution could  
543 depend on the number of local sensory information as presented here. Future work should  
544 decipher whether increased spatial coding resolution is associated with better navigational  
545 accuracy and spatial memory.

## 546 **Materials and methods**

547

### 548 **Animals**

549 All experiments were approved by the Institut National de la Santé et de la Recherche  
550 Médicale (INSERM) animal care and use committee and authorized by the Ministère de  
551 l'Éducation Nationale de l'Enseignement Supérieur et de la Recherche (agreement number  
552 02048.02), in accordance with the European community council directives (2010/63/UE).

553 Data were acquired from 8 male mice C57BL/6J (Janvier/Charles River) between 8 and 12  
554 weeks during the recording phase (weight: 21 – 23.6 g). The mice were housed 2 or 3 per  
555 cages before the first surgery and then individually with 12 inverted light/dark cycles.  
556 Trainings and recordings occurred during the dark phase.

557

### 558 **Surgical procedure to prepare head fixation**

559 A first surgery was performed to implant a fixation bar later used for head-fixation. Animals  
560 were anesthetized with isoflurane (3%) before intraperitoneal injection of ketamine (100  
561 mg/Kg) mixed with xylazine (10 mg/Kg) supplemented with a subcutaneous injection of  
562 buprenorphine (0.06 mg/Kg). Two jeweller's screws were inserted into the skull above the  
563 cerebellum to serve as reference and ground. A dental cement hat was then constructed  
564 leaving the skull above the hippocampi free to perform the craniotomies later on. The free  
565 skull was covered with a layer of agarose 2% (wt/vol) and sealed with silicon elastomer  
566 (Kwik-Cast, World Precision Instruments). A small titanium bar (0.65 g; 12 x 6 mm) was  
567 inserted in the hat above the cerebellum to serve as a fixation point for a larger head plate  
568 used for head fixation only during trainings and recordings.

569

### 570 **Virtual reality set up**

571 A commercially available virtual reality system (Phenosys Jetball-TFT) was combined with a  
572 custom designed 3D printed concave plastic wheel (center diameter: 12.5 cm; side diameter:  
573 7.5 cm; width: 14 cm, covered with silicon-based white coating) to allow 1D movement with  
574 a 1/1 coupling between movement of the mouse on the wheel and movement of its avatar  
575 in the virtual reality environment. This solution was preferred to the original spherical  
576 treadmill running in a X-only mode (which takes into account only rotations of the ball in the  
577 X axis to actualize the position of the avatar in the virtual reality environment) which also

578 allows 1D movement but with a more variable coupling between movement of the mouse  
579 on the treadmill and its avatar in the virtual reality environment. The wheel was surrounded  
580 by six 19-inches TFT monitors, which altogether covered a 270 degrees angle. Monitors were  
581 elevated so that the mice's eyes level corresponded to the lower third of the screen height  
582 to account for the fact that rodents field of view is biased upward. The head fixation system  
583 (Luigs and Neumann) was located behind the animal to not interfere with the display of the  
584 virtual reality environment. The virtual reality environment was a virtual 200 cm long and 32  
585 cm wide linear maze with different patterns on the side and end walls and virtual 3D objects  
586 (see virtual reality environments section). Movement of the wheel actualized the mouse's  
587 avatar position. The mouse could only perform forward or backward movements but could  
588 not turn back in the middle of the track (see training section).

589

## 590 **Virtual reality environments**

### 591 *No Object Track ( $\emptyset T$ )*

592 Each side wall had a unique pattern (black and orange stripes on one wall; green crosses on  
593 black background on the other wall). End-walls had grey triangular or round shapes on a  
594 yellow background (Fig. 1A).

### 595 *Object Track (OT)*

596 This maze was identical to the  $\emptyset T$  maze concerning wall patterns and dimensions but 3  
597 virtual objects were included on the sides between the animal trajectory and the walls (Fig.  
598 1A). The objects were a yellow origami crane (dimensions: 9 x 9 x 7 cm; position: 37 cm from  
599 end wall), a blue and grey cube (dimensions: 5 x 5 x 5 cm; position: 64 cm from end wall) and  
600 a tree (15 x 15 x 22 cm; position: 175 cm from end-wall). The animal could neither orient  
601 toward the objects nor get any sensory feedback from them by any other mean but vision.

### 602 *Enriched Objects Track (EOT)*

603 This maze had the same dimensions as previous mazes and included the same virtual reality  
604 objects (identical dimensions and locations than in the previous maze) but the side walls had  
605 distinct symmetrical patterns in different locations along the maze (50 cm long; black dots  
606 on white background, black and green squares, black and white stripes and green crosses on  
607 black background). Outside the maze walls, two large 3D columns were positioned on each  
608 side (dimensions 8 x 8 x 47 cm; positions 58 and 143 cm from end wall) to provide additional  
609 visual cues.

610

## 611 **Training**

612 Mice were first habituated to the experimentalist through daily handling sessions of 20 min  
613 or more that continued throughout the experiment. After a 3 days post-surgery recovery  
614 period, mice were water-deprived (1 ml/day, including the quantity of water taken during  
615 the training). After 2-3 days of water deprivation, they were progressively trained to run in  
616 the virtual reality set up. First, mice were familiarized with running head-fixed on the wheel  
617 for water rewards in a black track (screens always black). During these sessions, animals  
618 received as a reward sweetened water (5% sucrose) for each 50 centimeters run on the  
619 wheel. When animals were comfortable with the setup, they were trained to run in one of  
620 three linear virtual tracks (familiar track) assigned randomly. When animals reached the end  
621 of the track, a liquid reward delivery tube extended in front of the animal and animal had to  
622 lick to get the reward (a 4  $\mu$ L drop of water of 5% sucrose). Animals were then teleported  
623 in the same position but facing the opposite direction of the maze and had to run up to the  
624 end of the maze in the opposite direction to get another reward. Animals were initially  
625 trained during 15 minutes sessions. Session time was progressively increased to reach 60  
626 minutes. *Ad libidum* water access was restored if the weight of the animal decreased  
627 beneath 80% of the pre-surgery weight at any stage during training.

628

## 629 **Recording procedure**

630 When animals reached a stable behavioral performance (at least 1 reward/minute during 60  
631 minutes), we performed acute recordings using silicon probes (4/8 shanks; A-32/A-64  
632 Buzsaki Probe, Neuronexus). On the day before recording, animals were anesthetized  
633 (induction: isoflurane 3%; maintenance: Xylazine/Ketamine 10/100 mg/Kg supplemented  
634 with Buprenorphine 0.1 mg/Kg) and a craniotomy was drilled above one hippocampus  
635 (centered on a location -2 mm posterior and  $\pm$  2.1 mm lateral from bregma). The craniotomy  
636 was covered with agarose (2% in physiological saline) then sealed with silicon elastomer  
637 (Kwik-Cast, World Precision Instruments). On the day of the recording the backside of the  
638 probe's shanks was covered with a thin layer of a cell labeling red-fluorescent dye (Dil, Life  
639 technologies) so that its location (tips of the shanks) could be assessed post-hoc  
640 histologically. The silicon probe was then lowered into the brain while the animal was

641 allowed to walk freely on the wheel with the screens displaying a black background. The  
642 good positioning of the probe with recording sites in the CA1 pyramidal cell layer was  
643 verified by the presence of multiple units showing complex spike bursts on several  
644 recordings sites and the recording of sharp-wave ripples during quiet behavior. After  
645 positioning of the silicon probe the virtual reality environment was displayed on the screen.  
646 All mice ( $n = 8$ ) experienced first the familiar environment (either  $\emptyset$ T, OT or EOT) for around  
647 20 back and forth trials. For mice trained in  $\emptyset$ T or OT ( $n = 3$  and  $2$ , respectively), this first  
648 exploration was followed, after 3 minutes of free running with the screens displaying a black  
649 background, by exploration of a new environment, identical to the previous one except for  
650 the presence of the three 3D objects (objects were added for mice trained in  $\emptyset$ T and  
651 removed for mice trained in OT) for another 20 consecutive back and forth trials. For some  
652 of these mice ( $n = 2$  for EOT,  $n = 1$  for OT and  $n = 2$  for  $\emptyset$ T) sessions in the familiar track and  
653 novel track were divided into two sub-sessions interleaved by 3 min of free running with the  
654 screens black. The two sub-sessions in the familiar environment and the new environment  
655 were pulled together for analysis. Note that animals stayed head-fixed on the wheel  
656 surrounded by screens during the entire recording session.

657

## 658 **Data Acquisition and Pre-Processing**

659 The position of the animal in the virtual maze was digitalized by the virtual reality controlling  
660 computer (Phenosys) and then sent to a digital-analog card (0-4.5V, National Instrument  
661 Board NI USB-6008) connected to the external board (I/O Board, Open Ephys) of a 256  
662 channels acquisition board (Open Ephys). Neurophysiological signals were acquired  
663 continuously on a 256-channels recording system (Open Ephys, Intan Technologies,  
664 RHD2132 amplifier board with RHD2000 USB interface board) at 25,000 Hz. Spike sorting  
665 was performed semi-automatically using KlustaKwik (Rossant et al., 2016);  
666 <https://github.com/klusta-team/klustakwik>). Clusters were then manually refined using  
667 cluster quality assessment, auto- and cross-correlograms, clusters waveforms and similarity  
668 matrix (Klustaviewa(Rossant et al., 2016)).

669

## 670 **Data Analysis**

671 All subsequent analyses were conducted using custom-developed softwares written in  
672 MATLAB (MathWorks).

### 673 **Reward & Object Zones Definition**

674 The reward zones, located between the maze extremities and 10% of the track length (0-20  
675 cm and 180-200 cm), were not considered in the analysis. The object zone was composed of  
676 two zones, one from 30 to 70 cm including both the origami crane and the cube and the  
677 other from 160 to 180 cm including the tree.

### 678 **Firing Rate Map**

679 The maze was divided into 100 spatial bins measuring 2 cm. For each trial, the number of  
680 spikes and the occupancy time of the animal in each spatial bin were calculated to obtain the  
681 spikes number vector and the occupancy time vector, respectively. These vectors were  
682 smoothed using a Gaussian filter with a half-width set to 10 spatial bins. Spikes occurring  
683 during epochs when velocity was lower than 2 cm/s were removed from all analysis. The  
684 smoothed spikes number vector was divided by the smoothed occupancy time vector to  
685 obtain the firing rate vector for each trial. The firing rate vectors were pooled for a specific  
686 condition (e.g., Familiar Objects Track) and direction of the animal (e.g., back) to generate a  
687 firing rate map. These pooled vectors were also averaged to provide the mean firing rate  
688 vector, corresponding to the mean firing rate for each spatial bin.

### 689 **Pyramidal Cell Classification**

690 Cells with a mean firing rate lower than 20 Hz and either a burst index (Royer et al., 2012)  
691 greater than 0 or the spike duration greater than 0.4 ms were classified as putative  
692 pyramidal neurons. They were classified as interneurons otherwise.

### 693 **Active Cells Classification**

694 A cell was considered as active when the mean firing rate was greater than 0.5 Hz, the peak  
695 firing rate was greater than 1.5 Hz and the cell fired at least one spike in 50% of the trials.  
696 These 3 criteria had to be verified in either the forth or back direction.

### 697 **Place Fields Detection**

698 To detect a mean place field, a bootstrap procedure was performed. For each trial, a new  
699 spikes train was generated using a Poisson process with  $\lambda$  equal to the mean firing rate of  
700 the trial and a 1 ms time interval. A “randomized” firing rate map was then generated and  
701 the mean firing rate vector was determined and compared with the mean firing rate vector  
702 from the initial rate map. This operation was repeated 1000 times to determine a *P*-value

703 vector ( $P$ -value for each 2 cm spatial bin). Place fields candidates were defined as a set of  
704 more than 3 continuous spatial bins associated with  $P$ -values lower than 0.01. Two place  
705 fields were merged when the distance between their closest edges was at most equal to 5  
706 spatial bins (10 cm). Place fields' edges were extended by at most 5 spatial bins (for each  
707 edge) when the  $P$ -value was below 0.30 for these bins. A field with a size greater than 45  
708 spatial bins (90 cm) was not considered as a place field. To validate a mean place field, the  
709 cell had to verify a stability criterion. Spatial correlations were calculated between the firing  
710 rate vector of each trial and the mean firing rate vector. The spatial bins corresponding to  
711 other detected place fields were not considered in the spatial correlations. The place field  
712 was validated if the spatial correlations were greater than 0.60 for at least 40% of trials.  
713 Unless specified, when several mean place fields were detected, only the place field with the  
714 highest peak was conserved. An active cell with at least one place field in one direction was  
715 considered as a place cell.

716 The same procedure was applied to detect place fields per lap without the stability criterion,  
717 which cannot be calculated on single trials. A place field per lap was conserved if it  
718 overlapped at least 1 spatial bin with the closest mean place field.

### 719 **Stability Index**

720 The stability index of a cell was computed as the mean of the spatial correlations between all  
721 pairs of firing rate vectors. This way, the cell stability index takes into account the activity  
722 patterns from all the trials and provides a reliable quantification of the inter-trial  
723 reproducibility of the cells activity. Note that this stability index is different from usual  
724 stability indexes based on correlations of mean firing rates between even and odd trials or  
725 two halves of the same recording session thus values obtained cannot be directly compared.

### 726 **Spatial Information**

727 The spatial information (SI) was calculated according to the following formula (Skaggs et al.,  
728 1996):

$$SI = \sum_{i=1}^N \left[ \frac{FR_i}{\overline{FR}} \times \frac{OT_i}{OT_T} \times \log_2 \left( \frac{FR_i}{\overline{FR}} \right) \right]$$

729 where  $N$  is the number of spatial bins ( $N = 100$ ),  $FR_i$  is the mean firing rate determined in  
730 the  $i$ -th spatial bin,  $\overline{FR}$  is the mean firing rate,  $OT_i$  is the mean occupancy time determined  
731 in the  $i$ -th spatial bin,  $OT_T$  is the total occupancy time based on the mean occupancy time  
732 vector.



733 As another measure of spatial information, we computed the Mutual Information using the  
734 following formula:

$$MI = \sum_{i=1}^N \sum_{j=1}^4 p_{i,j} \log_2 \left( \frac{p_{i,j}}{p_i \cdot p_j} \right)$$

735 Where N is the total number of spatial bins,  $p_i$  is the occupancy probability of the animal in  
736 the i-th spatial bin,  $p_j$  is the probability to obtain a firing rate amongst one of 4 non  
737 overlapping quartiles of firing rates and  $p_{i,j}$  is the joint probability of the animal to be in the i-  
738 th spatial bin with a firing rate in the j-th quartile. The Mutual Information was then  
739 normalized with a surrogate based distribution to correct possible bias due to basal firing  
740 rate (Souza et al., 2018).

#### 741 **Out/In Field Firing Ratio**

742 The out/in field firing ratio was computed as the ratio between the mean firing rate outside  
743 the mean place field (excluding secondary place fields) and the mean firing rate inside the  
744 mean place field.

#### 745 **Place Field Dispersion**

746 A place field dispersion measure has been computed to quantify how much each place field  
747 per lap was dispersed around the mean place field. The place field dispersion (PFD) was  
748 calculated according to the following formula:

$$PFD = \frac{L}{N} \left[ \frac{1}{M} \sum_{i=1}^M (C - C_i)^2 \right]^{\frac{1}{2}}$$

749 where C is the center of the mean place field,  $C_i$  is the center of the field in the i-th lap and M  
750 is the number of laps with a single-trial detected field, L is the total length of the maze and N  
751 is the number of spatial bins. The center of a place field was defined as the spatial bin with  
752 the highest firing rate.

#### 753 **Place Field Width**

754 Place field width was computed as the distance between the place field edges and only  
755 determined for entire place fields. A place field was considered as complete when its firing  
756 rate increased above 30% of the difference between highest and lowest place field activity  
757 and then dropped below this threshold.

#### 758 **On-Track and End-Track Fields**

759 A mean place field was considered as End-Track field if the peak of the field was located at  
760 the beginning of the reward zone (i.e., at the 11-th or the 90-th spatial bin). All other fields  
761 were classified as On-Track fields.

#### 762 **Distribution of place fields' position**

763 To statistically assess whether the place fields were non-uniformly distributed in the maze,  
764 we tested the null hypothesis that all fields were uniformly distributed. Based on this  
765 hypothesis, the total number of place fields was redistributed with an equal probability to be  
766 in each 10-cm spatial bin. The standard deviation of this uniform distribution was then  
767 compared to the initial distribution. This operation was repeated 1000 times (bootstrap  
768 procedure) to obtain a *P*-value, corresponding to the probability of the place fields to be  
769 uniformly distributed. When this *P*-value was lower than 0.05, the null hypothesis was  
770 rejected and the distribution was considered as non-uniform. To ensure that single values of  
771 place fields' percentage in a given bin did not make the distribution non-uniform, values  
772 greater than the 93-th percentile and lower than the 6-th percentile have been excluded  
773 from the initial distribution.

#### 774 **Local Stability**

775 A local stability index was developed to assess how consistent a firing rate was over the laps  
776 for a given spatial bin. To this end, two mean firing rate vectors were calculated, in the  
777 neighborhood of each spatial bin (2-spatial bins half-window) for even and odd trials. Local  
778 stability index was defined as the spatial correlation between these two vectors for a given  
779 spatial bin.

#### 780 **Position Decoding**

781 To address how informative the firing rates of the CA1 pyramidal cells ensemble were about  
782 the position of the animal in the different virtual environments, we used Bayesian decoding  
783 and Firing Rate Vectors (FRV) methods. For each time window, the distribution of the animal  
784 position probability across the whole maze was calculated using the firing activity of all  
785 active cells (place cells and non place cells). The mode of this distribution (maximum of  
786 probability) was chosen as the decoded position for a given time window. We used a  
787 classical "memoryless" Bayesian decoder (Brown et al., 1998; Zhang et al., 1998). The  
788 decoding of the spikes data was restricted to periods when the animal was running (speed >  
789 2 cm/s) or with good Theta/Delta ratio and cross-validated using the "leave one out"

790 approach. We computed the animal's probability to be in each spatial bin  $x$  (2 cm) knowing  
791 that  $N$  cells fired  $n$  spikes in a time window according to the following formula:

$$P(x|n) = C(\tau, n)P(x) \left( \prod_{i=1}^N f_i(x)^{n_i} \right) \exp \left( -\tau \sum_{i=1}^N f_i(x) \right)$$

792 with  $P(x)$  a uniform spatial prior,  $f_i(x)$  the average firing rate of the neuron  $i$  over  $x$  (i.e., the  
793 tuning curve over the position),  $n_i$  the number of spikes emitted by the neuron  $i$  in the  
794 current time window and  $\tau$  the length of the time window (150 ms; non-overlapping) and  
795  $C(\tau, n)$  a normalization factor intended to set the posterior probability for one time window  
796 to 1. This formula assumes that the spikes trains obey to a Poisson process and that cells  
797 activity is independent. Position decoding was also performed using the FRV method  
798 (Middleton and McHugh, 2016). For each 100 ms time bin, the Pearson correlations were  
799 calculated between firing rates across all cells and the mean firing rates from all cells for a  
800 given spatial bin. A decoding error was defined as the absolute value of the difference  
801 between decoded and real position. Accuracy was defined as the probability at the real  
802 position in a particular time bin. To ensure that the position decoding was not influenced by  
803 the number of cells, a drop cell approach was performed (van der Meer et al., 2010). Briefly,  
804 for  $M$  recorded active cells, the position was decoded using  $k$  different subsets of cells with  
805 increasing sizes  $5 \cdot k$  with  $k$  ranging from 1 to the last multiple of 5  $< M$ . For the  $k$ -th subset,  
806 the decoding was repeated 50 times using  $5 \cdot k$  randomly selected cells and the median value  
807 of probabilities for a given time and spatial bin was chosen as the final probability. The  
808 presented results were computed for a subset composed of 20 cells ( $k = 4$ ).

### 809 **Map Similarity over Trials**

810 To analyze the dynamic of the changes of spatial representation between familiar and novel  
811 conditions, map similarities were performed for 10 back and forth trials before and after the  
812 experimental manipulation. For each active putative pyramidal cell, map similarities  
813 consisted of the Pearson correlation between the firing rate map of each back and forth trial  
814 and a template firing rate map. This template firing rate map was calculated as the average  
815 of the firing rate map from all the laps in the condition with objects (most stable condition).  
816 The maps corresponding to back (forth) trials were correlated to the mean back (forth) trial  
817 map in the object condition and the correlations values were averaged to obtain a single  
818 value for this back and forth trial. When map similarity was determined for a lap in the  
819 object condition, the template firing rate map was computed without it.

## 820 **Landmark Vector cells detection**

821 For this analysis, we defined individual objects zones (IOZ) for each object. For a given  
822 object, IOZ corresponded to all spatial bins occupied by the object plus an additional margin  
823 of 7 spatial bins (14 cm), which was always located before the object in the animals'  
824 movement reference frame to take into account the anticipatory nature of some LV cells  
825 (Geiller et al., 2017). Thus IOZ for each object were different for back and forth directions.  
826 Here are the IOZ defined for each object in both directions: origami crane: 20-42 cm and 32-  
827 56 cm, cube: 46-68 cm and 60-82 cm and tree 154-180 cm and 166-180 cm. A cell was  
828 classified as LV cell if at least one of its place fields was in the same IOZ for both directions  
829 (note that secondary mean place fields were included in this analysis).

## 830 **Phase precession Analysis**

831 Phase precession was calculated on all spikes (above speed threshold) for the track with  
832 objects but restrained to Spatially Stable Trials (SST) in the no object condition to equalize  
833 stability between both conditions. SST consisted of at least 3 trials where the in-field  
834 correlation with the mean place field exceeded 0.6. To assess theta phase precession, the  
835 Local Field Potential (LFP) of the channel with the highest number of pyramidal cells (Skaggs  
836 et al., 1996) was filtered (4<sup>th</sup> order Chebyshev filter type II) in the theta band (4-12Hz). The  
837 instantaneous theta phase for each time bin (1 ms) was determined using the Hilbert  
838 transform of the filtered LFP and a phase was attributed to each spike. Only theta phase  
839 locked cells were considered in the following analysis (non-uniform phase distribution,  $P <$   
840 0.05, Rayleigh test). Circular linear analysis was used to determine the correlation strength  
841 and slope value of the relation between spikes phases and normalized positions (0-1)  
842 through the mean place field (Kempster et al., 2012). Briefly, the phase precession slope was  
843 computed with a linear regression model between circular (spike phases) and linear  
844 (animal's position) data. The slope of the regression was used to scale the animal's position  
845 and to transform it into a circular variable. A circular-circular correlation could thus be  
846 computed on the data to assess the strength of the relationship between spike phases and  
847 animal's position. A significance value was determined by re-computing the correlation  
848 values for 1000 permutations of the spikes position.

849 Analysis of phase precession on single-trial detected fields was also performed (Schmidt et  
850 al., 2009). Phase precession slope and correlation values were computed similarly to the  
851 previously described method. The single lap slope and correlation values were averaged

852 only for sessions with at least 3 significantly precessing trials where the cell emitted a  
853 minimum of 4 spikes inside the mean place field.

#### 854 **Unit-LFP shift and Spike Phase Spectrum**

855 To quantify phase precession independently of the position of the animal and the place field  
856 detection, Unit-LFP shift was used. For all active putative pyramidal cells, a discreet  
857 multitaper spectrum in the theta band (4-12Hz) of the cell's spikes was performed  
858 (mtpointspectrum, Chronux) as well as the continuous multitaper spectrum of the  
859 simultaneously recorded LFP (mtspectrumc, Chronux). A theta modulation index (Mizuseki et  
860 al., 2009) was defined for each cell spike spectrum as the mean power around the peak  
861 theta frequency  $\pm 0.5$  Hz divided by the mean power below 5Hz or above 9Hz. A cell was  
862 considered as theta modulated if this index was greater than 1.4. The cross correlogram was  
863 then calculated for theta modulated cells to determine the lag in the theta band between  
864 the LFP and the cells' spectrum (Geisler et al., 2007). A positive lag indicates that the cell is  
865 firing faster than the concurrent LFP.

#### 866 **Speed modulation of theta frequency and Amplitude**

867 The instantaneous theta frequency was computed from the instantaneous theta phase  
868 extracted from the Hilbert transform of the filtered LFP in the theta band. For each time  $t_i$ ,  
869 the instantaneous theta frequency ( $F_\theta(t_i)$ ) was determined based on the unwrapped phase:

$$F_\theta(t_i) = \frac{Phase(t_{i+1}) - Phase(t_i)}{2\pi * Fs}$$

870 where  $Fs$  is the sampling frequency.

871 Instantaneous theta amplitude was defined as the module of the LFP Hilbert transform and  
872 normalized by the mean LFP theta amplitude. The Pearson correlation coefficient was then  
873 calculated between the speed of the animal and theta frequency/amplitude.

874 A theta peak detection method was also used to calculate the instantaneous theta  
875 frequency. Theta peaks were detected with zero crossing of the instantaneous LFP phase  
876 and frequency was deduced from the time between two successive theta peaks. This value  
877 was affected to all the time stamp of the corresponding cycle.

#### 878 **Theta timescale correlation**

879 To calculate the theta timescale lag between the spikes of two overlapping place fields, two  
880 cross-correlograms (CCGs) were computed (Skaggs et al., 1996; Dragoi and Buzsáki, 2006;  
881 Robbe and Buzsaki, 2009). First a "Real time-scale" CCG was computed with a 1 s time

882 window and 3 ms time bin. The CCG time lag was defined as the peak of the filtered CCG  
883 between [0-2] Hz. “Theta time-scale” CCG was computed with a 200 ms time window and 1  
884 ms time bin. The theta time lag was defined as the peak of the filtered CCG between [0-20]  
885 Hz. Only pairs of cells with a CCG mean bin count of 1 count/ms were included in this  
886 analysis. The relation between the CCG time lag and theta time lag was assessed using  
887 Pearson correlation.

### 888 **Preferred Theta Phase**

889 Preferred theta phase and Mean Resultant Vector Length of each cell were defined thanks to  
890 `circ_mean` and `circ_r` circular statistics Matlab toolbox functions (Berens, 2009). Global  
891 phase 180° was defined as the maximal pyramidal cells activity (Skaggs et al., 1996).

892

### 893 **Code availability**

894 All custom written codes used in the present study are available upon reasonable request.

### 895 **Statistics**

896 All statistical analyses were conducted using Matlab codes (MathWorks). For each  
897 distribution, a Lilliefors goodness-of-fit test was used to verify if the data were normally  
898 distributed and a Levene test was used to assess for equal variance. If normality or equal  
899 variance were not verified, we used the Wilcoxon rank sum test otherwise the Student t-test  
900 was used to compare two distributions. In case of multiple comparisons, the Kruskal-Wallis  
901 test with Bonferroni post-hoc test was used. Spatial correlations were computed using  
902 Pearson’s correlation coefficient. Chi-square test was used to compare percentages of phase  
903 precessing cells. For circular distributions comparison, we first tested if they came from a  
904 Von-Mises distributions (Watson Test) with a common concentration (`circ_ktest`), if the  
905 distribution respected these constrains circular ANOVA: Watson-Williams multi-sample test  
906 for equal means (`circ_wwtest`) was applied.

907

### 908 **Data availability**

909 Data acquired in the present work are stored on INMED server and available upon  
910 reasonable request.

## 911 **References**

- 912 Aronov D, Tank DW (2014) Engagement of Neural Circuits Underlying 2D Spatial Navigation  
913 in a Rodent Virtual Reality System. *Neuron* 84:442–456.
- 914
- 915 Barry C, Lever C, Hayman R, Hartley T, Burton S, O’Keefe J, Jeffery K, Burgess N (2006) The  
916 Boundary Vector Cell Model of Place Cell Firing and Spatial Memory. *Rev Neurosci*  
917 17:71–97.
- 918
- 919 Battaglia FP (2004) Local Sensory Cues and Place Cell Directionality: Additional Evidence of  
920 Prospective Coding in the Hippocampus. *J Neurosci* 24:4541–4550.
- 921
- 922 Berens P (2009) CircStat : A *MATLAB* Toolbox for Circular Statistics. *J Stat Softw.*
- 923
- 924 Brown EN, Frank LM, Tang D, Quirk MC, Wilson M a (1998) A statistical paradigm for neural  
925 spike train decoding applied to position prediction from ensemble firing patterns of rat  
926 hippocampal place cells. *J Neurosci* 18:7411–7425.
- 927
- 928 Burke SN, Maurer AP, Nematollahi S, Uprety AR, Wallace JL, Barnes CA (2011) The influence  
929 of objects on place field expression and size in distal hippocampal CA1. *Hippocampus*  
930 21:783–801.
- 931
- 932 Cabral HO, Fouquet C, Rondi-Reig L, Pennartz CMA, Battaglia FP (2014) Single-Trial  
933 Properties of Place Cells in Control and CA1 NMDA Receptor Subunit 1-KO Mice. *J*  
934 *Neurosci* 34:15861–15869.
- 935
- 936 Chen G, King JA, Burgess N, O’Keefe J (2013) How vision and movement combine in the  
937 hippocampal place code. *Proc Natl Acad Sci* 110:378–383.
- 938
- 939 Cohen JD, Bolstad M, Lee AK (2017) Experience-dependent shaping of hippocampal CA1  
940 intracellular activity in novel and familiar environments. *Elife* 6:1–27.
- 941
- 942 Connor CE, Knierim JJ (2017) Integration of objects and space in perception and memory.  
943 *Nat Neurosci* 20:1493-1503.
- 944
- 945 Danielson NB, Zaremba JD, Kaifosh P, Bowler J, Ladow M, Losonczy A (2016) Sublayer-  
946 Specific Coding Dynamics during Spatial Navigation and Learning in Hippocampal Area  
947 CA1. *Neuron* 91:652–665.
- 948
- 949 Deshmukh SS, Knierim JJ (2011) Representation of Non-Spatial and Spatial Information in the  
950 Lateral Entorhinal Cortex. *Front Behav Neurosci* 5:69.
- 951
- 952 Deshmukh SS, Knierim JJ (2013) Influence of local objects on hippocampal representations:  
953 Landmark vectors and memory. *Hippocampus* 23:253–267.
- 954
- 955 Dragoi G, Buzsáki G (2006) Temporal Encoding of Place Sequences by Hippocampal Cell  
956 Assemblies. *Neuron* 50:145-57.



- 957 Dupret D, O’Neill J, Pleydell-Bouverie B, Csicsvari J (2010) The reorganization and  
958 reactivation of hippocampal maps predict spatial memory performance. *Nat Neurosci*  
959 13:995–1002.  
960
- 961 Epstein RA, Patai EZ, Julian JB, Spiers HJ (2017) The cognitive map in humans: Spatial  
962 navigation and beyond. *Nat Neurosci* 20:1504–1513.  
963
- 964 Fenton AA, Kao H-Y, Neymotin SA, Olypher A, Vayntrub Y, Lytton WW, Ludvig N (2008)  
965 Unmasking the CA1 Ensemble Place Code by Exposures to Small and Large  
966 Environments: More Place Cells and Multiple, Irregularly Arranged, and Expanded Place  
967 Fields in the Larger Space. *J Neurosci* 28:11250–11262.  
968
- 969 Geiller T, Fattahi M, Choi JS, Royer S (2017) Place cells are more strongly tied to landmarks in  
970 deep than in superficial CA1. *Nat Commun* 8:14531.  
971
- 972 Geisler C, Robbe D, Zugaro M, Sirota A, Buzsaki G (2007) Hippocampal place cell assemblies  
973 are speed-controlled oscillators. *Proc Natl Acad Sci U S A* 104:8149–8154.  
974
- 975 Geva-Sagiv M, Las L, Yovel Y, Ulanovsky N (2015) Spatial cognition in bats and rats: From  
976 sensory acquisition to multiscale maps and navigation. *Nat Rev Neurosci* 16:94–108.  
977
- 978 Hartley T, Burgess N, Lever C, Cacucci F, O’Keefe J (2000) Modeling place fields in terms of  
979 the cortical inputs to the hippocampus. *Hippocampus* 10:369–379.  
980
- 981 Hetherington PA, Shapiro ML (1997) Hippocampal place fields are altered by the removal of  
982 single visual cues in a distance-dependent manner. *Behav Neurosci* 111:20–34.  
983
- 984 Hirase H, Czurkó A, Csicsvari J, Buzsáki G (1999) Firing rate and theta-phase coding by  
985 hippocampal pyramidal neurons during “space clamping.” *Eur J Neurosci* 11:4373–4380.  
986
- 987 Hollup S a, Molden S, Donnett JG, Moser MB, Moser EI (2001) Accumulation of hippocampal  
988 place fields at the goal location in an annular watermaze task. *J Neurosci* 21:1635–1644.  
989
- 990 Holscher C (2005) Rats are able to navigate in virtual environments. *J Exp Biol* 208:561–569.  
991
- 992 Kempter R, Leibold C, Buzsáki G, Diba K, Schmidt R (2012) Quantifying circular-linear  
993 associations: Hippocampal phase precession. *J Neurosci Methods* 207:113–124.  
994
- 995 Kentros CG, Agnihotri NT, Streater S, Hawkins RD, Kandel ER (2004) Increased attention to  
996 spatial context increases both place field stability and spatial memory. *Neuron* 42:283–  
997 295.  
998
- 999 Knierim JJ, Hamilton DA (2011) Framing spatial cognition: neural representations of proximal  
1000 and distal frames of reference and their roles in navigation. *Physiol Rev* 91:1245–1279.  
1001
- 1002 Knierim JJ, Neunuebel JP, Deshmukh SS (2013) Functional correlates of the lateral and  
1003 medial entorhinal cortex: objects, path integration and local-global reference frames.



- 1004 Philos Trans R Soc B Biol Sci 369:20130369  
1005
- 1006 Knierim JJ, Rao G (2003) Distal landmarks and hippocampal place cells: Effects of relative  
1007 translation versus rotation. *Hippocampus* 13:604–617.  
1008
- 1009 Le Merre P, Esmaeili V, Charrière E, Galan K, Salin PA, Petersen CCH, Crochet S (2018)  
1010 Reward-Based Learning Drives Rapid Sensory Signals in Medial Prefrontal Cortex and  
1011 Dorsal Hippocampus Necessary for Goal-Directed Behavior. *Neuron* 97:83–91.  
1012
- 1013 McNaughton BL, Battaglia FP, Jensen O, Moser EI, Moser MB (2006) Path integration and the  
1014 neural basis of the “cognitive map.” *Nat Rev Neurosci* 7:663–678.  
1015
- 1016 Middleton SJ, McHugh TJ (2016) Silencing CA3 disrupts temporal coding in the CA1  
1017 ensemble. *Nat Neurosci* 19:945–951.  
1018
- 1019 Mizuseki K, Sirota A, Pastalkova E, Buzsáki G (2009) Theta Oscillations Provide Temporal  
1020 Windows for Local Circuit Computation in the Entorhinal-Hippocampal Loop. *Neuron*  
1021 64:267–280.  
1022
- 1023 Muller RU, Kubie JL, Ranck JB (1987) Spatial firing patterns of hippocampal complex-spike  
1024 cells in a fixed environment. *J Neurosci* 7:1935–1950.  
1025
- 1026 O’Keefe J, Burgess N (1996) Geometric determinants of the place fields of hippocampal  
1027 neurons. *Nature* 381:425–428.  
1028
- 1029 O’Keefe J, Conway DH (1978) Hippocampal place units in the freely moving rat: why they fire  
1030 where they fire. *Exp Brain Res* 31:573–590.  
1031
- 1032 O’Keefe J, Nadel L (1978) The hippocampus as a cognitive map. *hippocampus as a Cognitive*  
1033 *map.* (Oxford University Press, London).  
1034
- 1035 O’Keefe J, Recce ML (1993) Phase relationship between hippocampal place units and the EEG  
1036 theta rhythm. *Hippocampus* 3:317–330.  
1037
- 1038 Poucet B, Chaillan F, Truchet B, Save E, Sargolini F, Hok V (2015) Is there a pilot in the brain?  
1039 Contribution of the self-positioning system to spatial navigation. *Front Behav Neurosci*  
1040 9:1–10.  
1041
- 1042 Ravassard P, Kees A, Willers B, Ho D, Aharoni D, Cushman J, Aghajan ZM, Mehta MR (2013)  
1043 Multisensory control of hippocampal spatiotemporal selectivity. *Science* 340:1342–  
1044 1346.  
1045
- 1046 Renaudineau S, Poucet B, Save E (2007) Flexible use of proximal objects and distal cues by  
1047 hippocampal place cells. *Hippocampus* 17:381–395.  
1048
- 1049 Rich PD, Liaw HP, Lee AK (2014) Large environments reveal the statistical structure governing  
1050 hippocampal representations. *Science* 345:814–817.

- 1051  
1052 Robbe D, Buzsaki G (2009) Alteration of Theta Timescale Dynamics of Hippocampal Place  
1053 Cells by a Cannabinoid Is Associated with Memory Impairment. *J Neurosci*  
1054 29(40):12597-605.  
1055  
1056 Rossant C, Kadir SN, Goodman DFM, Schulman J, Hunter MLD, Saleem AB, Grosmark A,  
1057 Belluscio M, Denfield GH, Ecker AS, Tolias AS, Solomon S, Buzsaki G, Carandini M, Harris  
1058 KD (2016) Spike sorting for large, dense electrode arrays. *Nat Neurosci* 19:634–641.  
1059  
1060 Royer S, Zemelman B V., Losonczy A, Kim J, Chance F, Magee JC, Buzsáki G (2012) Control of  
1061 timing, rate and bursts of hippocampal place cells by dendritic and somatic inhibition.  
1062 *Nat Neurosci* 15:769–775.  
1063  
1064 Sato M, Mizuta K, Islam T, Kawano M, Gomez-Dominguez D, Kim K, Yamakawa H, Ohkura M,  
1065 Fukai T, Nakai J, Hayashi Y (2018) Dynamic embedding of salience coding in  
1066 hippocampal spatial maps. *bioRxiv*:1–74.  
1067  
1068 Schlesiger MI, Cannova CC, Boubilil BL, Hales JB, Mankin EA, Brandon MP, Leutgeb JK, Leibold  
1069 C, Leutgeb S (2015) The medial entorhinal cortex is necessary for temporal organization  
1070 of hippocampal neuronal activity. *Nat Neurosci* 18:1123–1132.  
1071  
1072 Schmidt R, Diba K, Leibold C, Schmitz D, Buzsaki G, Kempter R (2009) Single-Trial Phase  
1073 Precession in the Hippocampus. *J Neurosci* 29:13232–13241.  
1074  
1075 Sheynikhovich D, Chavarriaga R, Strösslin T, Arleo A, Gerstner W (2009) Is There a Geometric  
1076 Module for Spatial Orientation? Insights From a Rodent Navigation Model. *Psychol Rev*  
1077 116:540–566.  
1078  
1079 Skaggs WE, McNaughton BL, Wilson MA, Barnes CA (1996) Theta phase precession in  
1080 hippocampal neuronal populations and the compression of temporal sequences.  
1081 *Hippocampus* 6:149–172.  
1082  
1083 Souza BC, Pavão R, Belchior H, Tort ABL (2018) On Information Metrics for Spatial Coding.  
1084 *Neuroscience*. 375:62-73.  
1085  
1086 Spiers HJ, Hayman RMA, Jovalekic A, Marozzi E, Jeffery KJ (2015) Place field repetition and  
1087 purely local remapping in a multicompartiment environment. *Cereb Cortex* 25:10–25.  
1088  
1089 Strösslin T, Sheynikhovich D, Chavarriaga R, Gerstner W (2005) Robust self-localisation and  
1090 navigation based on hippocampal place cells. *Neural Networks* 18:1125–1140.  
1091  
1092 Taylor KD (1978) Range of Movement and Activity of Common Rats ( *Rattus Norvegicus* ) on  
1093 Agricultural. *J Appl Ecol* 15:663–677.  
1094  
1095 Tolman EC (1948) Cognitive maps in rats and men. *Psychol Rev* 55:189–208.  
1096  
1097 van der Meer MAA, Johnson A, Schmitzer-Torbert NC, Redish AD (2010) Triple dissociation of

- 1098 information processing in dorsal striatum, ventral striatum, and hippocampus on a  
1099 learned spatial decision task. *Neuron* 67:25–32.  
1100
- 1101 Wiener SI, Paul CA, Eichenbaum HB (1989) Spatial and behavioral correlates of hippocampal  
1102 neuronal activity. *J Neurosci* 9:2737–2763.  
1103
- 1104 William E. Skaggs and Bruce L. McNaughton and Katalin M. Gothard and Etan J. Markus  
1105 (1993) An Information-Theoretic Approach to Deciphering the Hippocampal Code. *Proc*  
1106 *IEEE*:1030--1037.  
1107
- 1108 Wilson M, McNaughton B (1993) Dynamics of the hippocampal ensemble code for space.  
1109 *Science* (80- ) 261:1055–1058.  
1110
- 1111 Youngstrom IA, Strowbridge BW (2012) Visual landmarks facilitate rodent spatial navigation  
1112 in virtual reality environments. *Learn Mem* 19:84–90.  
1113
- 1114 Zhang K, Ginzburg I, McNaughton BL, Sejnowski TJ (1998) Interpreting neuronal population  
1115 activity by reconstruction: unified framework with application to hippocampal place  
1116 cells. *J Neurophysiol* 79:1017–1044.  
1117

A

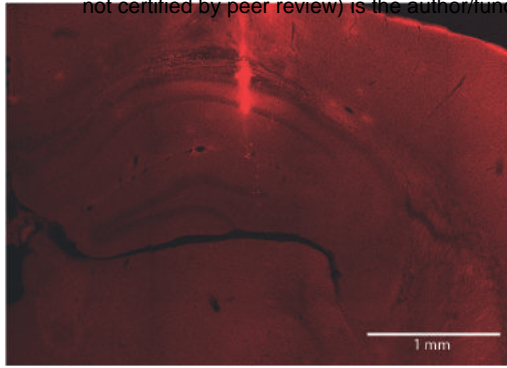

B

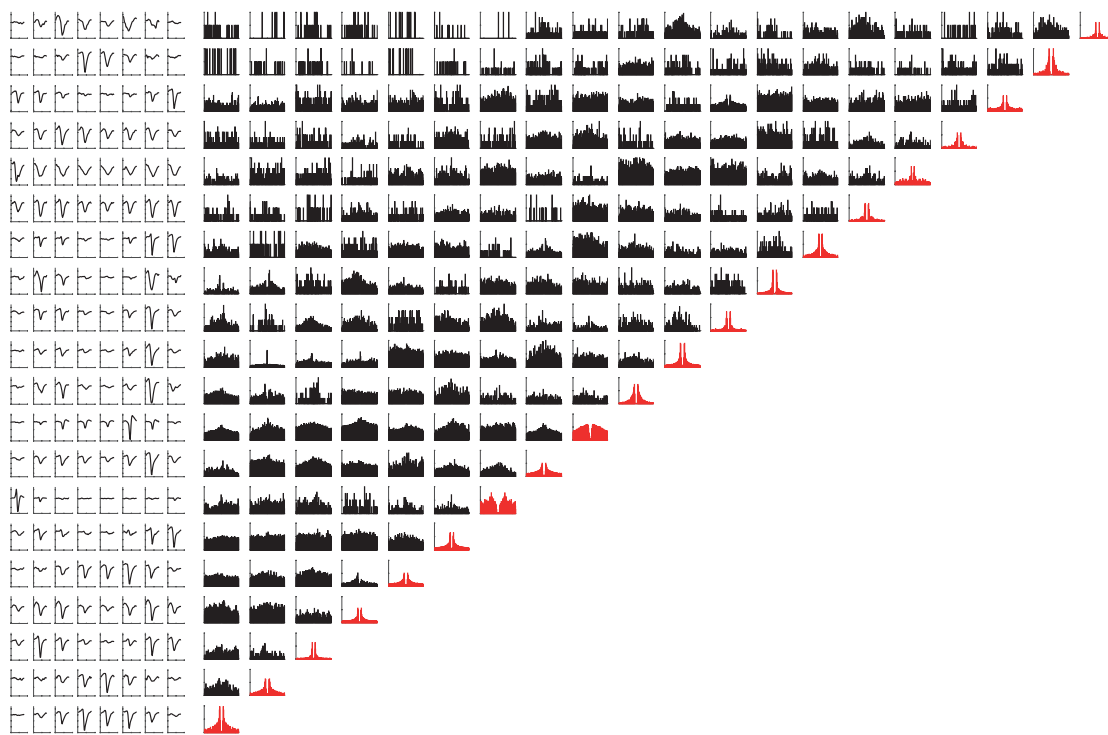

## Figure 1 - figure supplement 1: Histology and spike sorting

**A.** Representative histology slide showing a silicon probe track ending in CA1 pyramidal layer. Scale bar: 1 mm. **B.** (Right) Auto-correlograms (red) and cross-correlograms (black) of 20 CA1 units recorded simultaneously. (Left) Average units waveforms (for visualization each row is normalized by the unit maximum average waveform).

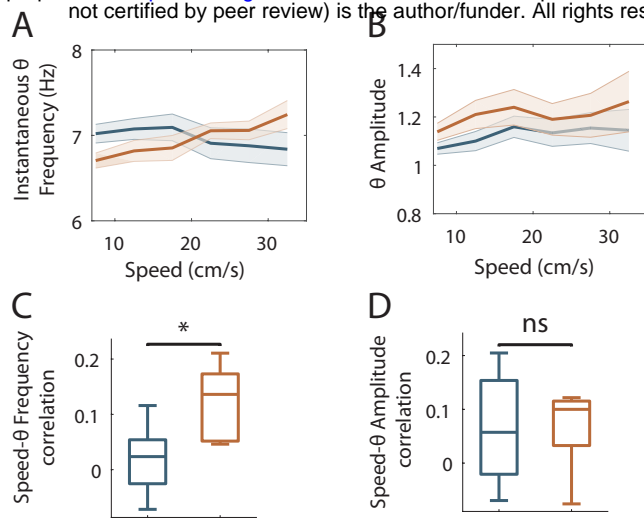

**Figure 6 - figure supplement 1: Speed modulation of LFP theta frequency and amplitude in OT and ØT**

**A-B.** Mean theta frequency (**A**) or amplitude (**B**) across all recording sessions as a function of animal speed (bin: 5 cm/s). **C-D.** Box plots of the correlation between theta frequency (**C**;  $P = 0.01$ , two-tailed unpaired  $t$ -test) or amplitude (**D**;  $P = 0.9$ , two-tailed unpaired  $t$ -test) vs speed for individual sessions.

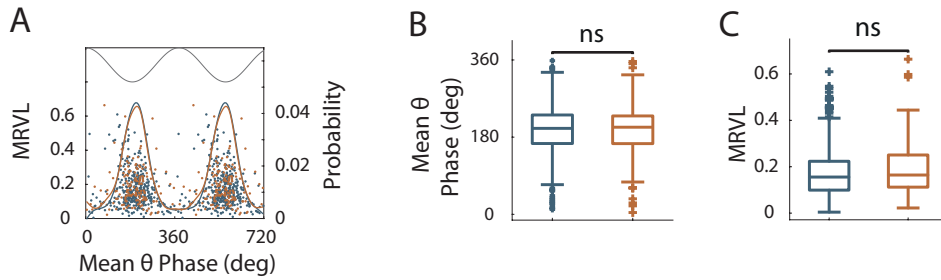

### Figure 6 - figure supplement 2: Theta modulation of spikes in OT and ØT

**A.** Mean theta phase plotted against strength of phase locking (Mean Resultant Vector Length: MRLV ) for all theta modulated cells ( $P < 0.05$ , Rayleigh Test ) in OT (orange) and ØT (blue). Solid lines: probability distribution of the preferred theta phase for the two conditions. Black line: illustrative theta cycle **B.** Box plots of the mean theta phase for OT(orange) and ØT (blue) conditions ( $P = 0.77$ ,  $F = 0.08$ , circular ANOVA ) **C.** Box plots of the Mean Resultant Vector Length in OT(orange) and ØT (blue) conditions ( $P = 0.1$ , two-tailed WRS test).
